# Supplementary material
Source: publisher figshare collection journal article supplement (https://gsapubs.figshare.com/ndownloader/files/28038876)
Supplement: Supplementary file 1 [file 28038876]

## Sheet: Sheet1
Scheingross, J.S., et al., 2019, Preservation of organic carbon during active fluvial transport and particle abrasion: Geology, v. 47, p. 958–962, https:// doi.org/10.1130/G46442.1

## Sheet: TableDR1
Table DR1: Flow velocity measurements*
	Height above the bed (cm)					Depth-averaged
	3	5	8	10	13
Flow velocity (m/s) with paddle wheel at 55 RPM	0.244	0.241333	0.246333	0.241667	0.232667	0.238
Flow velocity (m/s) with paddle wheel at 60 RPM	0.258333	0.260667	0.266667	0.262667	0.251333	0.256
* All flow measurements made in triplicate with deviations in temporally average velocity <0.002 m/s. Measurements bracket the 55 - 60 RPM range of paddle wheel rotational velocities. Paddle wheel rotational velocity (expressed in revolutions per minute, RPM) scales with, but does not equate to, fluid velocity.

## Sheet: TableDR2
Table DR2: Summary of experiments
Exp #	Sediment	POC type	Experiment length (days)	Suspended sediment transport distance* (km)	Bedload transport distance* (km)	u*/ws initial#	u*/ws final#	Sieved grain size (μm)	Flume sediment mass (g)	Control sediment mass (g)	Water ratio (DI:tap)	Flume volume (L)	Control volume (L)	Ending flume volume (L)	Ending control volume (L)
Main Experiments
4	Posidonia Shale	POCpetro	55.9	1210	850	29	51	< 63	70.1	38.6	10:1	29	16	27	15.4
5	Posidonia Shale	POCpetro	56	1209.6	850	2.5	3.2	63-125	70	38.6	10:1	29	16	27.3	15.5
6	Posidonia Shale	POCpetro	56	1209.6	850	0.13	1500	500-1000	70	36.8	10:1	29	16	27.6	16
9	Lignite	POCpetro	42	910	640	170	120	< 500	70	38.6	10:1	29	16	27.1	15.2
10	Rio Bermejo	POCbio	40.9	880	620	46	35	No sieving	70	38.6	10:1	29	16	26.4	15
11	Lookout Creek	POCbio	40.9	880	620	23	20	< 63	54.2†	29.8	10:1	29	16	26	14.8
12	Lookout Creek	POCbio	40.9	880	620	2.7	2.8	63-125	70	38.6	10:1	29	16	27.4	15.2
13	Lookout Creek	POCbio	41	880	620	1	0.94	125-250	70	38.6	10:1	29	16	26.6	15.1
14	Lookout Creek	POCbio	41	880	620	0.15	0.55	500-1000	70	38.6	10:1	29	16	27	14.8
Blank Experiments
7	No sediment	N/A	41.9	910	640	N/A	N/A	N/A	0	0	10:1	29	16	26.3	15
8	Combusted Quartz	N/A	42	910	640	0.55	0.48	No sieving	70.1	38.6	10:1	29	16	27.2	15.1
Pilot Experiments
1	Soil and Combusted Quartz	POCbio	27.9	600	420	7.8	6.1	Soil: < 125 Qtz: > 125	Soil: 150 Qtz: 50	Soil: 46.2 Qtz: 15.3	1:0	29	7	N/A	N/A
2	Lignite	POCpetro	35.9	780	550	140	140	< 500	100.2	17.4	1:0	29	5	29	N/A
3	Posidonia Shale	POCpetro	19.9	429.84	300	0.78	0.81	125-250	60§	11§	0:1	29	5	27.1	N/A
* See Data Repository Section 2 for transport distance calculations.
# u*/ws > 1 indicates sediment is in suspension and u*/ws < 1 indicates sediment moves primarily as bedload. Initial and final values are based on particle median grain size measured at the start and end of the flume experiments (Table DR3), respectively, see Data Repository Section 2 for details.
† Limited sample availability prevented the use of sediment loadings inline with other primary experiments
§ An additional 59.7 and 11.0 g of sediment was added to the flume and control, respectively, after 14 days of run time

## Sheet: Table DR3
Table DR3: Summary of solid load carbon, rhenium, and granulometry measurements*
Exp #	Sediment	Description	Time (days)	Corg (%)	δ13Corg (‰)	Re (ppb)	D16† (μm)	D50† (μm)	D84† (μm)	SSA§ (m2/g)
1	Soil	Flume and control initial material	0	35.1022	-26.6764	5.84	14.1348	48.4947	89.237	-
1	Soil	Final material (control)	27.9	34.9745	-26.5691		18.9146	59.3785	99.3833	-
1	Soil	Final material (flume)	27.9	37.401	-26.5701		17.2245	55.8879	98.0907	-
2	Lignite	Flume and control initial material	0	18.3367	-24.7565	2.27	4.03181	12.2206	33.3384	7.1867
2	Lignite	Final material (control)	35.9	17.2395	-24.681		N/A	N/A	N/A	-
2	Lignite	Final material (flume)	35.9	19.6814	-24.6917		3.80777	11.5522	28.9995	7.926
3	Shale	Flume and control initial material	0	15.1203	-29.4947	33.62	73.8208	195.12	308.749	10.5894
3	Shale	Final material (control)	19.9	14.2256	-29.5369		91.5737	201.917	315.971	9.8682
3	Shale	Final material (flume)	19.9	15.5568	-29.5419		79.2346	189.997	300.317	9.7437
4	Shale	Flume and control initial material	0	12.2744	-29.4912	47.12	5.09187	24.7003	57.2286	11.8143
4	Shale	Final material (control)	55.9	12.5272	-29.4982		7.5358	31.7355	65.2075	13.1883
4	Shale	Final material (flume)	55.9	12.396	-29.533		3.7693	18.8013	47.0579	12.1286
5	Shale	Flume and control initial material	0	14.3223	-29.52	62	35.9602	91.5946	136.261	10.7318
5	Shale	Final material (control)	55.9	15.9977	-29.4733		11.4402	69.7074	117.039	11.6525
5	Shale	Final material (flume)	55.9	15.8547	-29.4793		21.9084	81.3616	130.642	11.0729
6	Shale	Flume and control initial material	0	14.8706	-29.4664	63.1	665.82#	866.66#	1184.8#	9.3187
6	Shale	Final material (control)	55.9	14.6424	-29.532		635.51#	815.52#	1097.4#	10.1979
6	Shale	Final material (flume)	55.9	13.9679	-29.4316		0.54	4.2	366.12	14.7249
8	Quartz	Flume and control initial material	0	<det	<det	0.007	175.006	246.422	342.639	-
8	Quartz	Final material (control)	42.3	<det	<det		181.935	263.222	381.852	-
8	Quartz	Final material (flume)	42.3	<det	<det		200.693	275.92	386.79	-
9	Lignite	Flume and control initial material	0	18.0957	-24.7018		3.85133	11.4346	32.3577	7.1867
9	Lignite	Final material (control)	42.27	17.7375	-24.6601		5.6208	13.3637	33.9449	6.8181
9	Lignite	Final material (flume)	42.27	19.1505	-24.6909		5.34174	12.517	30.0394	8.1591
10	Rio Bermejo	Flume and control initial material	0	0.260211	-26.9412	0.19	5.75807	19.6629	50.4477	-
10	Rio Bermejo	Final material (control)	42.17	0.276026	-26.9041		7.30886	25.2149	54.7695	-
10	Rio Bermejo	Final material (flume)	42.17	0.267519	-27.0735		6.74626	23.2408	52.272	-
11	Lookout Creek	Flume and control initial material	0	3.84136	-27.6478		9.25511	27.9167	61.2077	-
11	Lookout Creek	Final material (control)	41.71	3.73476	-27.5951		7.82057	22.4274	52.4649	-
11	Lookout Creek	Final material (flume)	41.71	3.86416	-27.6339		9.38618	29.7954	62.507	-
12	Lookout Creek	Flume and control initial material	0	2.57694	-27.7383		17.8477	89.3589	135.05	-
12	Lookout Creek	Final material (control)	42.06	2.75036	-27.6896		14.44	82.2863	136.321	-
12	Lookout Creek	Final material (flume)	42.06	2.63344	-27.8179		18.3937	86.5604	134.97	-
13	Lookout Creek	Flume and control initial material	0	0.934093	-27.9977		18.4833	164.169	260.71	-
13	Lookout Creek	Final material (control)	41.96	0.863587	-28.116		9.16824	154.13	242.335	-
13	Lookout Creek	Final material (flume)	41.96	0.839797	-28.0629		12.3689	171.9	275.095	-
14	Lookout Creek	Flume and control initial material	0	0.741264	-27.4885		569.48#	726.17#	935.06#	-
14	Lookout Creek	Final material (control)	41.82	0.666552	-27.284		322.27#	705.89#	941.02#	-
14	Lookout Creek	Final material (flume)	41.82	0.683461	-27.4213		97.28#	250.44#	670.71#	-
* <det indicates value was below the machine detection limit, - indicates no measurements were made
† D16, D50, and D84 are the grain sizes for which 16%, 50%, and 84% of grains in the sample are smaller, respectively.
§ SSA is sediment specific surface area measured using a gas sorption analyzer
# Grain size measurements made via particle image analysis with a Retsch Technology Camsizer XT

## Sheet: Table DR4
Table DR4: Results of liquid-chromatography organic carbon detection (LC-OCD) measurements*
Exp #	Time (days)	Control or Flume	DOC (mg-C/L)	HOC (mg-C/L)	CDOC (mg-C/L)	Bio Polymers (mg-C/L)	Humic Substances (mg-C/L)	Building Blocks (mg-C/L)	LMW Neutrals (mg-C/L)	LMW Acids (mg-C/L)
1	9.8	Control	32.5534	32.5534	0	1.52314	23.6935	3.26157	4.0746	-
1	16.3	Control	39.0652	39.0652	0	1.99811	28.8409	4.16242	4.06327	-
1	23.1	Control	40.5666	39.5958	0.970727	1.86591	30.1533	4.0406	3.53636	-
1	27.9	Control	41.8414	41.2908	0.550519	1.87913	31.872	3.81492	3.72427	-
1	-0.05	Flume	0.766284	0.641762	0.124521	0.0249042	0.0543365	0.00478927	0.558429	-
1	1.9	Flume	28.2663	25.2328	3.03352	1.24521	17.8408	2.78831	3.35824	-
1	7.66	Flume	34.7605	34.0134	0.747126	1.92816	25.0331	3.2251	3.82759	-
1	9.8	Flume	37.6149	35.7778	1.83716	2.02203	26.702	3.67241	3.38123	-
1	16.3	Flume	39.1284	38.2692	0.859195	1.95977	29.0351	3.70594	3.56897	-
1	23.1	Flume	38.5728	36.9138	1.659	1.01916	28.9484	3.54215	3.40421	-
1	27.9	Flume	41.9828	38.8487	3.1341	0.688697	30.1651	3.96552	4.02874	-
2	-0.05	Control	0.257	0.121	0.136	0.002	0.002	0.003	0.122	0.006
2	-0.05	Control	0.291218	-	-	-	-	-	-	-
2	1	Control	2.36261	-	-	-	-	-	-	-
2	1	Control	1.702	0.48	1.222	0.009	0.382	0.158	0.608	0.064
2	5.9	Control	2.29367	-	-	-	-	-	-	-
2	5.9	Control	1.61	0.272	1.338	0.011	0.808	0.194	0.327	-
2	15.9	Control	2.48536	-	-	-	-	-	-	-
2	15.9	Control	1.79	0.424	1.366	0.011	0.751	0.226	0.379	-
2	25	Control	2.31161	-	-	-	-	-	-	-
2	25	Control	1.962	0.257	1.706	0.047	0.818	0.334	0.507	-
2	35.9	Control	2.13031	-	-	-	-	-	-	-
2	35.9	Control	1.924	0.375	1.55	0.04	0.595	0.311	0.562	0.041
2	-0.05	Flume	0.331	0.056	0.275	0.002	0.03	0.021	0.222	-
2	-0.05	Flume	0.20491	-	-	-	-	-	-	-
2	1	Flume	3.5779	-	-	-	-	-	-	-
2	1	Flume	3.568	0.966	2.602	0.002	1.354	0.361	0.813	0.073
2	5.9	Flume	2.33711	-	-	-	-	-	-	-
2	5.9	Flume	2.512	0.555	1.957	0.013	1.114	0.386	0.444	-
2	15.9	Flume	2.07838	-	-	-	-	-	-	-
2	15.9	Flume	1.89	0.38	1.511	0.03	0.807	0.272	0.393	0.009
2	25	Flume	1.49008	-	-	-	-	-	-	-
2	25	Flume	1.32	0.275	1.045	0.006	0.548	0.205	0.255	0.032
2	35.9	Flume	1.38905	-	-	-	-	-	-	-
2	35.9	Flume	1.38	0.328	1.052	0.001	0.393	0.247	0.264	0.147
3	-1.067	Control	1.71725	<det†	1.71725	0.00738334	1.13911	0.255405	0.315298	<det
3	-0.088	Control	1.69917	<det	1.69917	0.0113408	1.08207	0.298996	0.306675	<det
3	0.006	Control	1.72245	<det	1.72245	0.00637921	1.05332	0.334377	0.328411	<det
3	0.641	Control	1.80744	0.0454814	1.76196	0.00437094	1.01246	0.288246	0.417543	0.0393414
3	1.044	Control	1.54211	<det	1.54211	0.00880095	1.03787	0.26645	0.229061	<det
3	3.714	Control	1.58884	<det	1.58884	0.0119315	1.02759	0.290963	0.258299	<det
3	7.745	Control	1.69262	<det	1.69262	0.00649734	0.961478	0.36456	0.360012	<det
3	14.016	Control	2.02451	<det	2.02451	0.00998228	0.923158	0.268813	0.797519	0.0250401
3	14.641	Control	1.51914	<det	1.51914	0.0188423	0.9137	0.299291	0.28736	<det
3	14.672	Control	1.81217	<det	1.81187	0.00590667	0.988941	0.321855	0.495157	<det
3	15.112	Control	1.66686	0.0564678	1.6104	0.00431187	0.953837	0.309864	0.342351	<det
3	15.112	Control	1.52658	<det	1.52658	0.00779681	0.93194	0.324276	0.26267	<det
3	15.112	Control	1.64702	<det	1.64702	0.00632014	0.888999	0.365328	0.386415	<det
3	17.953	Control	1.58771	0.0255168	1.5622	0.00927348	0.896738	0.383698	0.272534	<det
3	17.953	Control	1.62085	<det	1.62085	0.00779681	0.923836	0.338452	0.350738	<det
3	19.87	Control	1.71618	<det	1.71618	0.0105729	0.899643	0.325517	0.480508	<det
3	19.87	Control	1.71116	0.0190195	1.69214	0.00649734	0.897833	0.339279	0.448671	<det
3	-1.067	Flume	1.80833	<det	1.80833	0.00643828	1.06536	0.314471	0.385174	0.0368805
3	-0.088	Flume	1.86291	<det	1.86291	0.0137626	1.14445	0.31394	0.390727	<det
3	0.006	Flume	1.8593	<det	1.8593	0.00903721	1.01558	0.310868	0.494684	0.0291381
3	0.641	Flume	1.89841	0.0257531	1.87265	0.00933255	0.9623	0.361075	0.529415	0.0105294
3	1.044	Flume	1.61429	0.0367395	1.57755	0.0152983	0.992582	0.317425	0.252156	<det
3	3.714	Flume	1.48955	<det	1.48955	0.00821028	0.969217	0.31896	0.193266	<det
3	7.745	Flume	1.54471	<det	1.54471	0.00378027	0.934495	0.331955	0.274365	<det
3	14.016	Flume	1.59846	<det	1.59846	0.00324867	1.0243	0.309214	0.261548	<det
3	14.641	Flume	1.44773	<det	1.44773	0.00389841	0.992669	0.212817	0.238275	<det
3	14.672	Flume	1.97956	<det	1.97956	0.00880095	1.05722	0.345068	0.566273	0.00220533
3	15.112	Flume	1.61134	0.0104548	1.60089	0.00324867	0.948985	0.357885	0.290608	<det
3	15.112	Flume	1.57826	<det	1.57732	0.00614294	0.941722	0.361607	0.267927	<det
3	15.112	Flume	1.61429	0.0385115	1.57578	0.00596574	0.986584	0.308506	0.274838	<det
3	17.953	Flume	1.64914	0.0426462	1.6065	0.00785588	0.965316	0.357295	0.275901	<det
3	19.87	Flume	1.68104	0.0102776	1.67076	0.00868281	0.961821	0.3557	0.344418	<det
4	-0.07	Control	0.338914	0.0661593	0.272755	0.00136986	0.0913013	0.0228311	0.15586	0.00139281
4	0.08	Control	0.576357	0.192643	0.383714	0.00167428	0.121135	0.0515474	0.209386	<det
4	0.92	Control	0.491121	0.164891	0.32623	0.0128869	0.123028	0.0423135	0.147945	<det
4	0.92	Control	0.499239	0.171487	0.327752	0.00162354	0.115452	0.0375951	0.173059	<det
4	6.89	Control	0.485033	0.163166	0.321867	0.00228311	0.113371	0.0432775	0.163014	<det
4	21.85	Control	0.35312	0.0875698	0.26555	0.00101471	0.112789	0.042618	0.109132	<det
4	35.12	Control	0.508879	0.190614	0.318265	0.00390665	0.114426	0.0404363	0.159513	<det
4	35.12	Control	0.342973	0.124353	0.21862	0.00126839	0.109994	0.0469305	0.0603754	<det
4	55.87	Control	0.31862	0.0139016	0.304718	0.00918316	0.12553	0.0479452	0.121867	<det
4	55.87	Control	0.332319	0.0849822	0.247336	0.00177575	0.115275	0.0400304	0.0901573	<det
4	-0.07	Flume	0.642821	0.118772	0.524049	0.00487062	0.115338	0.0266362	0.37727	<det
4	0.08	Flume	0.889904	0.240893	0.649011	0.00177575	0.132686	0.0629122	0.45175	<det
4	0.08	Flume	0.889904	0.240893	0.649011	0.00177575	0.132508	0.0629122	0.45175	<det
4	0.92	Flume	0.744292	0.147336	0.596956	0.00268899	0.0998385	0.0494673	0.444952	<det
4	0.92	Flume	0.772197	0.221258	0.550939	<det	0.108885	0.050279	0.359919	0.0318553
4	0.92	Flume	0.667174	0.162303	0.504871	<det	0.0923457	0.045104	0.36687	<det
4	6.89	Flume	0.480467	0.181126	0.29934	0.00385591	0.104792	0.0408422	0.149975	<det
4	21.85	Flume	1.10299	0.702689	0.400304	0.0028412	0.127916	0.0439371	0.225571	<det
4	35.12	Flume	0.443937	0.0825469	0.36139	0.00821918	0.145872	0.0503805	0.156722	<det
4	55.87	Flume	0.551497	0.141299	0.410198	<det	0.119024	0.0438864	0.246474	<det
4	55.87	Flume	0.454084	0.00147133	0.452613	0.0093861	0.142459	0.0568747	0.243988	<det
5	-0.12	Control	0.31101	0.127245	0.183765	<det	0.0988575	0.0203957	0.0641299	<det
5	0.09	Control	0.550482	0.094825	0.455657	0.00451547	0.147215	0.0396246	0.215271	0.0490304
5	0.95	Control	0.35515	0.0509893	0.30416	0.00101471	0.107799	0.0355657	0.159767	<det
5	0.95	Control	0.363775	0.142212	0.221563	<det	0.12651	0.0217656	0.073313	<det
5	0.95	Control	0.312532	0.0807204	0.231811	<det	0.115036	0.0281583	0.0885337	<det
5	7.92	Control	0.435312	0.00847286	0.426839	<det	0.118972	0.0280061	0.279452	<det
5	21.71	Control	0.268392	0.06621	0.202182	<det	0.112039	0.0243531	0.065652	<det
5	34.98	Control	0.31101	0.0289701	0.28204	<det	0.110269	0.0374429	0.133435	<det
5	55.96	Control	0.332826	0.0735667	0.259259	<det	0.128945	0.0224252	0.10756	<det
5	55.96	Control	0.379503	0.0391679	0.340335	<det	0.131603	0.0258245	0.182547	<det
5	55.96	Control	0.352106	0.0576357	0.29447	0.00111618	0.120262	0.0251649	0.147996	<det
5	-0.12	Flume	0.297311	0.0817859	0.215525	<det	0.0875966	0.0289193	0.099036	<det
5	0.09	Flume	0.486048	0.164739	0.321309	0.00157281	0.144558	0.0294267	0.145764	<det
5	0.95	Flume	0.459665	0.0508879	0.408777	0.00624049	0.165748	0.051243	0.18549	<det
5	7.92	Flume	0.450025	0.0527651	0.39726	0.00192796	0.146318	0.0701167	0.178945	<det
5	21.71	Flume	0.3379	0.0574835	0.280416	<det	0.145811	0.0215119	0.112938	<det
5	34.98	Flume	0.336885	0.0409944	0.29589	0.00131913	0.14569	0.0323694	0.116591	<det
5	55.96	Flume	0.769153	0.0897007	0.679452	0.00111618	0.163029	0.0511416	0.46413	<det
5	55.96	Flume	0.632674	0.0226281	0.610046	<det	0.151589	0.0319635	0.426129	<det
6	-0.12	Control	0.400304	0.0252664	0.375038	0.00360223	0.117441	0.0292745	0.224708	<det
6	0.08	Control	0.294267	0.0540335	0.240233	<det	0.0988552	0.0218671	0.119127	<det
6	0.94	Control	0.357686	0.0471842	0.310502	0.00279046	0.0977687	0.0300863	0.179909	<det
6	0.94	Control	0.381025	0.0523085	0.328716	0.00334855	0.110514	0.0325723	0.182344	<det
6	0.94	Control	0.26687	0.044343	0.222527	<det	0.116182	0.0258245	0.0798579	<det
6	21.7	Control	0.383054	0.108016	0.275038	<det	0.100459	0.0321157	0.142263	<det
6	34.95	Control	0.294267	0.0707255	0.223541	<det	0.098081	0.0300863	0.0952308	<det
6	55.95	Control	0.306951	0.0997971	0.207154	<det	0.0998815	0.0244546	0.0826991	<det
6	55.95	Control	0.34896	<det	0.34896	0.00208016	0.150169	0.0428209	0.153881	<det
6	55.95	Control	0.256215	0.0505835	0.205632	<det	0.109124	0.018417	0.0776256	<det
6	-0.13	Flume	0.338914	0.0829528	0.255961	0.0140538	0.106027	0.0286657	0.107154	<det
6	0.08	Flume	0.645318	0.0581808	0.587137	0.00543595	0.149626	0.047578	0.384661	<det
6	0.94	Flume	0.479268	0.0625202	0.416747	0.00759289	0.142252	0.0347873	0.232149	<det
6	10.91	Flume	0.506342	0.146728	0.359614	0.00228311	0.138092	0.0252156	0.193962	<det
6	21.7	Flume	0.651213	0.123342	0.527871	0.00415094	0.12179	0.071752	0.33035	<det
6	34.95	Flume	0.367834	0.0934044	0.274429	0.00202943	0.114523	0.0535261	0.104313	<det
6	55.95	Flume	0.446981	0.164282	0.282699	0.00705226	0.105664	0.0490107	0.120954	<det
6	55.95	Flume	0.478448	0.0645474	0.413901	0.00506466	0.165219	0.0347522	0.208782	<det
7	-0.01	Control	0.847813	0.110246	0.737567	0.00389455	0.0790963	0.0396645	0.610006	0.00490613
7	13.07	Control	0.41402	0.0877771	0.326243	0.00377472	0.116727	0.0110246	0.194787	<det
7	41.87	Control	0.331935	0.0980228	0.233913	0.00545237	0.092444	0.0298382	0.101019	0.00515931
7	-0.01	Flume	1.75614	0.0525464	1.70359	0.00197723	0.0863065	0.0379868	1.56675	0.0105778
7	2.99	Flume	0.409826	0.134152	0.275674	0.013601	0.108194	0.0367885	0.117136	<det
7	13.07	Flume	0.415818	0.154643	0.261174	0.0121031	0.0920956	0.0386459	0.109706	0.00862338
7	41.87	Flume	0.402636	0.0469742	0.355662	0.0137807	0.0950939	0.0554823	0.186159	0.00514581
8	-0.0766667	Control	2.28694	<det	2.28694	0.00365488	0.0726655	0.0273217	2.18322	<det
8	3.11458	Control	0.333134	0.0538047	0.279329	0.0037148	0.0979338	0.048592	0.0992211	0.0298673
8	15.1979	Control	0.269023	0.067885	0.201138	0.00623128	0.0865129	0.0322349	0.0721989	0.00396039
8	41.9929	Control	0.232475	0.0398442	0.19263	0.00605153	0.0805311	0.0332534	0.0660276	0.00676664
8	-0.0766667	Flume	1.26597	<det	1.26597	0.00724985	0.100724	0.022828	1.13517	<det
8	3.11458	Flume	0.174356	0.00251648	0.171839	0.00419413	0.0886993	0.0216896	0.0572199	<det
8	15.1979	Flume	0.26423	0.0573397	0.20689	0.011444	0.0721421	0.0455962	0.0770521	<det
8	41.9929	Flume	0.252846	0.0602157	0.19263	0.0110845	0.0863267	0.0206111	0.0698622	0.00474578
9	-0.0622222	Control	1.50629	0.029299	1.47699	0.00551228	0.0929725	0.0231276	1.35536	<det
9	0.212083	Control	1.51648	0.332475	1.184	0.0014979	0.61739	0.174955	0.243619	0.146541
9	1.06971	Control	1.40923	0.147214	1.26201	0.0118035	0.628233	0.269682	0.325464	0.0268299
9	7.12525	Control	1.84182	0.137807	1.70401	0.020012	1.1224	0.194428	0.367166	<det
9	22.16	Control	1.98562	0.169563	1.81606	0.0269023	1.063	0.312463	0.413721	<det
9	42.0072	Control	1.70701	0.03571	1.6713	0.0339724	0.992001	0.269682	0.375614	<det
9	-0.0622222	Flume	0.252846	0.135171	0.117675	0.00569203	0.0794588	0.0283403	<det	0.00418414
9	0.212083	Flume	2.90114	0.454164	2.44697	0.00347513	1.53314	0.395566	0.433253	0.0815384
9	1.06971	Flume	2.73098	0.477292	2.25368	<det	1.30485	0.310006	0.606591	0.0319382
9	7.12525	Flume	2.42181	0.322469	2.09934	0.0077891	1.24809	0.346375	0.497004	<det
9	22.16	Flume	1.74116	0.187537	1.55362	0.0245656	0.928384	0.327921	0.272678	<det
9	42.0072	Flume	1.53565	0.396465	1.13919	0.0113241	0.46058	0.22169	0.445656	<det
10	-0.0625	Control	0.209107	0.0445177	0.16459	0.00509287	0.0810844	0.0306171	0.047873	<det
10	0.215278	Control	0.402037	0.0753146	0.326723	0.0110246	0.171831	0.0350509	0.106471	0.00234529
10	1.08333	Control	0.374476	0.0330138	0.341462	0.0103056	0.170935	0.050689	0.109467	<det
10	7.13542	Control	0.55003	0.139964	0.410066	0.0180947	0.217662	0.0549431	0.119353	<det
10	22.1667	Control	0.40743	0.0153385	0.392091	0.022109	0.202928	0.0618334	0.105213	<det
10	42.0069	Control	0.515878	0.103176	0.412702	0.0131216	0.246074	0.0427801	0.110845	<det
10	-0.0625	Flume	0.260635	0.0671061	0.193529	0.00695027	0.0707929	0.0317555	0.0831037	<det
10	0.215278	Flume	0.52846	0.158418	0.370042	0.0103655	0.20054	0.0317555	0.127382	<det
10	1.08333	Flume	0.475734	0.0339125	0.441821	0.0308568	0.220935	0.0351708	0.154823	<det
10	7.13542	Flume	0.465548	0.118754	0.346794	0.0158179	0.20348	0.0470941	0.0803475	<det
10	22.1667	Flume	0.368484	0.0715998	0.296884	0.0150989	0.193901	0.040024	0.0479928	<det
10	42.0069	Flume	0.577591	0.0803475	0.497244	0.0473936	0.296391	0.0369682	0.116537	<det
11	-0.197779	Control	0.312762	0.0842421	0.22852	0.00401438	0.0941521	0.0266028	0.093589	0.0101618
11	0.0693042	Control	0.840024	0.154044	0.68598	0.0526663	0.390616	0.106171	0.134092	0.00243383
11	1.12139	Control	0.922109	0.118454	0.803655	0.0731576	0.441017	0.143379	0.133074	0.0130275
11	6.70139	Control	0.873817	<det	0.873817	0.111264	0.525057	0.0860995	0.151348	<det
11	18.8076	Control	0.913421	<det	0.913421	0.0941881	0.5653	0.10006	0.152666	0.00120663
11	40.9097	Control	0.985021	0.0496105	0.93541	0.0639904	0.610277	0.102157	0.14997	0.00901575
11	-0.2	Flume	0.259676	<det	0.259676	0.0115638	0.106161	0.033553	0.105752	0.00264676
11	0.07	Flume	0.977831	0.136249	0.841582	0.0554224	0.496171	0.106052	0.183883	<det
11	1.12139	Flume	1.15398	0.04997	1.10401	0.10018	0.649621	0.145057	0.209107	<det
11	6.70139	Flume	1.16836	0.0115039	1.15686	0.137987	0.709964	0.12163	0.186639	<det
11	18.8076	Flume	1.29359	0.0505692	1.24302	0.0572798	0.764959	0.120671	0.295267	0.00484298
11	40.9097	Flume	1.23847	0.0695626	1.1689	0.0295986	0.792512	0.151228	0.194308	0.00125668
12	-0.172222	Control	0.211504	0.0109646	0.200539	0.00377472	0.0900596	0.0310965	0.0686639	0.00694462
12	0.0673611	Control	0.429718	<det	0.429718	0.0324745	0.181747	0.0753146	0.13565	0.00453197
12	1.11944	Control	0.502696	0.0387058	0.46399	0.0474536	0.293679	0.0273817	0.0919113	0.00356524
12	6.73611	Control	0.547034	0.0200719	0.526962	0.0568005	0.363649	0.0338526	0.0672858	0.00537394
12	18.8415	Control	0.727561	<det	0.727561	0.0591971	0.431498	0.0715998	0.165309	<det
12	40.939	Control	0.740563	0.0403235	0.70024	0.0400839	0.44329	0.0838226	0.129299	0.00374396
12	-0.172222	Flume	0.208149	<det	0.208149	<det	0.0953415	0.0270821	0.08568	<det
12	0.0673611	Flume	0.508688	0.059317	0.449371	0.0384661	0.259571	0.0541043	0.0931696	0.00406033
12	1.11944	Flume	0.605632	<det	0.605632	0.0615339	0.366077	0.0762133	0.101857	<det
12	6.73611	Flume	0.776753	<det	0.776753	0.0742361	0.474084	0.0911923	0.137268	<det
12	18.8415	Flume	0.804014	<det	0.804014	0.0426603	0.520742	0.0953865	0.14272	0.00250547
12	40.939	Flume	0.817256	0.0345117	0.782744	0.0280407	0.531215	0.0965848	0.126902	<det
13	-0.145833	Control	0.234332	<det	0.234332	0.00359497	0.126354	0.0115039	0.0887358	0.0041436
13	0.0625	Control	0.326303	<det	0.326303	0.0268424	0.167437	0.0467346	0.0801678	0.0051214
13	1.11458	Control	0.402037	0.0536848	0.348352	0.019293	0.196848	0.0373277	0.0886159	0.00626813
13	6.72917	Control	0.432594	0.0300779	0.402516	0.032115	0.285468	0.0331935	0.0483523	0.00338787
13	18.8542	Control	0.548832	<det	0.548532	0.0375075	0.316831	0.0723188	0.118754	0.00312156
13	40.9688	Control	0.5716	0.0134212	0.558179	0.0217496	0.348724	0.0732774	0.1145	<det
13	-0.145833	Flume	0.252846	0.0295986	0.223247	0.0070701	0.0741504	0.0427801	0.0938886	0.00535829
13	0.0625	Flume	0.46435	0.0782504	0.386099	0.0165368	0.181983	0.0713002	0.109407	0.00687281
13	1.11458	Flume	0.634272	<det	0.634272	0.0300779	0.307582	0.0625524	0.234032	<det
13	6.72917	Flume	0.644098	0.0666866	0.577412	0.0384661	0.343487	0.0746555	0.119952	<det
13	18.8542	Flume	0.612343	0.00754943	0.604793	0.0336129	0.374453	0.0834032	0.113361	<det
13	40.9688	Flume	0.95686	0.0852606	0.8716	0.020731	0.357004	0.0812463	0.412343	<det
14	-0.1	Control	0.300779	0.0581786	0.2426	0.00287597	0.0920871	0.0408029	0.104853	0.00198119
14	0.06	Control	0.306531	<det	0.306531	0.0127621	0.140385	0.0424206	0.110965	<det
14	1.1	Control	0.318155	0.0992211	0.218933	0.00347513	0.144082	0.0461953	0.0251648	<det
14	6.72	Control	0.356501	0.00311564	0.353385	0.0158778	0.220674	0.0531456	0.0626123	0.0010756
14	18.88	Control	0.444218	<det	0.444218	0.0261234	0.265132	0.0545237	0.0974236	0.00101514
14	41	Control	0.506291	0.0355303	0.470761	0.0159976	0.296868	0.0577591	0.10012	<det
14	-0.1	Flume	0.211504	0.00784901	0.203655	0.00718993	0.0937584	0.027142	0.0756141	<det
14	0.06	Flume	0.309766	0.0669862	0.24278	0.00784901	0.157188	0.0394847	0.0382864	<det
14	1.1	Flume	0.602756	0.136908	0.465848	0.00784901	0.222769	0.0530258	0.181606	<det
14	6.72	Flume	0.496105	0.0809467	0.415159	0.0120431	0.24168	0.0473936	0.112283	0.00175878
14	18.88	Flume	0.879569	0.0542241	0.825345	0.0311564	0.232201	0.0857999	0.454943	0.0212447
14	41	Flume	0.495506	0.0691432	0.426363	0.0134212	0.231278	0.0689635	0.110665	0.00203507
* Time refers to days since addition of sediment and negative values represent the initial 20-30 hr of clear water prior to adding sediment. Abbreviations: DOC - dissolved organic carbon, HOC - hydrophobic organic carbon (DOC which does not pass through the chromatographic column), CDOC - chromatographic dissolved organic carbon (DOC which passes through the chromatographic column), LMW - Low mol…
† <det indicates value was below the detection limit, - indicates no measurements were made

## Sheet: Table DR5
Table DR5: Mutliprobe measurements of flume and control tank water
		Flume				Control
Exp #	Exp time (days)	pH	Conductivity (μS/cm)	Dissolved oxygen (%)	Water temp. (ºC)	pH	Conductivity (μS/cm)	Dissolved oxygen (%)	Water temp. (ºC)
1	0	4.5	25.5	99.5	23.3333	-	-	-	-
1	1	4.22	36.9	104.2	26.1333	-	-	-	-
1	2	4.3	33.7	99.5	24.6333	-	-	-	-
1	3	4.2	35.9	100.3	26.6	-	-	-	-
1	4	4.3	35.4	101.2	24.9333	-	-	-	-
1	5	4.3	36.8	101.1	24.2667	-	-	-	-
1	8	4.3	37.8	105.9	22.8	-	-	-	-
1	9	4.4	39.4	105	22.8333	-	-	-	-
1	10	4.4	39.3	104.3	22.7333	4.2	42.4	44.9	21.5333
1	11	4.4	39.8	104.4	23.2333	4.2	42.7	57.1	23.2667
1	14	4.3	40.9	101.3	24.8333	4.3	42.4	44.1	21.8333
1	17	4.3	41.4	103.3	23.4333	4.3	44.2	63.7	24.5667
1	21	4.3	43	103.5	25.0667	-	-	66.225	23.6
1	23	4.25	43.5	102.2	24.2667	4.3	44.8	69.1	23.3667
1	25	4.3	44	101.1	25.6667	4.37	45.2	69.9	24.1
1	28	4.2	45.4	99.8	24.7667	4.3	47.7	70.75	23.5667
2	0	6.32	11.7	100.6	23.5	6.25	11.6	99	23.4667
2	0.1	5.391	54.6	100.6	23.4	5.56	43.1	99.9	23.4
2	1	5.226	68.1	101.2	24.8667	5.72	49	96.6	23.1
2	4	5.05	83	98.8	23.7667	5.69	67	80.7	22.1
2	6	4.93	94.1	99.4	23.3	5.515	70.1	77.6	21.6333
2	8	4.79	107.1	99.6	23.1	5.085	77.2	82.8	21.5333
2	11	4.47	137.3	102.3	23.2667	4.961	86.2	86.4	21.5
2	12	4.39	143.3	101.4	23.6333	4.997	88.6	88.5	21.7
2	14	4.336	155.8	102.2	25.0333	4.92	94.1	85.4	23.3667
2	15	4.201	163.3	100.8	25.8667	4.78	96.9	86	24.3667
2	18	4.017	193	100.9	25.5667	4.74	108.3	84.1	24.2333
2	20	3.901	207	101.6	25.8667	4.67	114	85.4	24.3333
2	22	3.838	222	101.6	25.8333	4.588	119.6	85.1	24.3
2	25	3.74	241	103	23.6	4.43	129	92.6	22.3
2	27	3.69	251	102.5	26.0333	4.4	135.3	90.4	24.0667
2	29	3.67	261	102.9	24.8	4.35	141.9	-	23.3
2	33	3.608	281	102.8	25.5667	4.29	153.4	-	23.8667
2	34	3.6	287	101.5	26.1	4.3	158.3	89	24.5667
2	36	3.59	295	101.7	23.8333	4.27	163.1	87.3	22.2
3	-1.067	8.095	577	99.1	19.3	7.76	530	95.9	17.8
3	-0.2845	8.458	571	99.4	22.4	7.97	529	100.5	21.3
3	0.023	8.344	567	98.5	22.8	8.2024	529	100.2	21.9
3	0.641333	8.164	495	99.2	23.5	8.024	526	97.5	22.1
3	1.04425	8.228	474	99.1	24.1	8.048	525	96.1	22.7
3	3.71425	8.146	449	100.3	23.2	8.086	516	95.2	22.3
3	5.72467	8.067	447	100.2	23.8	8.029	512	94.6	22
3	7.7455	8.029	448	99.9	22.6	8.08	507	96.4	20.3
3	11.7872	7.88	451	104	20.2	8.045	496	99.9	18.2
3	14.0163	7.94	453	103.3	20.3	8.053	492	102.7	18.3
3	14.6413	8.034	454	103.1	20.5	8.069	491	101.2	18.3
3	14.6726	7.998	455	102.8	20.2	8.057	493	102.3	18.2
3	15.1122	7.932	454	102.1	21.3	7.966	492	100.4	19.4
3	17.9538	7.927	455	103.7	19.7	7.969	495	94.2	17.5
3	19.8705	8.005	457	103.4	21.1	7.981	493	99.1	20.4
4	-2.01042	7.15	60.4	98	19.5	6.7	60.3	93.3	19.8
4	-0.895833	-	60.9	-	24	-	60.3	-	20
4	-0.125	7.38	61	98.1	22.5	7.1	60.3	97.5	19.9
4	0.135417	8.7	100.3	98	22.7	8.6	96.9	97.9	20.2
4	13.0854	8.048	182.1	101.5	22.7	8.18	158	82.2	19.7
4	17.8646	7.96	184	102.2	22.7	8.08	169.7	91.3	19.6
4	19.1438	8.02	184.2	101.3	23.6	8.124	169.2	92	20.6
4	21.8125	7.97	187.8	101	22.9	8.15	173.6	89.6	19.9
4	27.8854	7.99	187.7	99.8	23	7.99	179.7	93.2	20.1
4	35.1042	8.055	187.4	100.4	23.6	8.049	185.1	96.1	21
4	41.9167	8.032	189.7	100	23	8.041	188.8	96.2	20.7
4	55.8021	7.95	190.9	101.6	23.6	7.94	193.7	99.2	21.2
5	-0.236125	7.3	75.2	98.7	22.4	6.9	68.5	96.2	19.8
5	0.107625	8.51	101.4	99	22.9667	8.35	87.7	96.6	20.3667
5	0.892208	8.33	121.4	98.3	23.1667	8.42	92.3	96.4	20.5
5	4.00901	8.07	158.9	99.2	22.9333	8.3	105.2	88.3	20.1333
5	12.9583	8.04	176.4	101.1	22.5667	8.08	138.2	94.7	19.9
5	17.743	7.95	179.5	101.9	22.3667	7.998	147.6	99	19.6333
5	21.6805	7.998	180.9	101.2	22.6333	8.09	152.2	95.8	19.8667
5	27.7535	7.97	182.4	99.9	22.9667	8.03	158.9	97.4	20.1333
5	34.993	8.011	183.1	100	23.7333	8.038	165.1	98.1	20.9333
5	41.8264	7.96	184.9	100.9	23.4333	8.008	170.4	99.1	20.7667
5	55.6701	7.98	186.8	99.7	23.6	7.72	177.4	99.9	21.2333
6	-0.270833	7.29	67.7	98.5	22.1333	6.8	63.3	97.7	19.8
6	0.08	8.56	90.7	98.5	22.8333	7.36	69.2	98.2	20.3
6	0.852083	8.46	110.4	98.1	23.1	7.29	71.6	97.5	20.4667
6	3.82292	8.02	180.8	99.4	23	7.7	82	93.6	20.3333
6	12.9354	7.98	203	100.7	22.4333	8.03	105.3	92.9	19.9333
6	17.7146	7.91	207	102.3	21.6	7.82	112.6	96.5	19.7
6	21.6458	7.97	210	101.7	22.3	7.84	119.7	94.9	19.9333
6	27.7188	7.98	214	100	22.9333	7.72	129	95.5	20.1667
6	34.9729	7.982	217	99.8	23.6333	8.048	140.1	97.2	20.9333
6	41.7917	7.958	222	100	22.9333	8.056	148.6	97.2	20.8
7	-2.85417	7.318	71.7	98.2	24.6	6.834	71	94.7	24.3
7	-3.33333e-07	7.685	72.6	97.7	26.6	7.357	71	96.5	23.8
7	1.03458	7.619	72.9	98.1	26.7	7.441	71	97.3	24
7	2.97917	7.779	70.9	101.3	26	7.601	69	99.8	23.1
7	6.95833	7.728	71	99.6	27.3	7.633	69.2	100.3	24.2
7	15.0521	7.765	71.7	99.2	26.5	7.693	69	98.9	23.5
7	21.9896	7.75	71.9	101.4	25.4	7.679	68.7	101.5	22.6
7	30.0292	7.665	72.7	98.3	24.7	7.577	69.5	97.3	21.8
7	36	7.658	73.2	98.5	25.4	7.583	69.4	98.3	22.4
7	41.8542	7.772	73.9	98.2	24.4	7.634	69	97.1	21.6
8	-0.08	7.64	70.7	97.6	26.4	7.358	71.6	97	23.4
8	0.2	7.55	70.8	97.7	27.2	7.344	71.7	97.3	23.9
8	1.01	7.681	70.9	67.8	26.8	7.471	71.8	97.7	23.9
8	3.11	7.771	68.8	101	26.2	7.621	69.5	100.1	23.2
8	7.11	7.79	68.9	100.2	27.8	7.898	69.5	100.1	24.3
8	15.2	7.765	68.8	99.4	27	7.763	69.4	98.8	23.6
8	22.15	7.804	68.7	101.8	26	7.765	69.3	101.3	22.6
8	30.18	7.788	69.1	98.2	25	7.729	69.7	97.4	21.9
8	36.17	7.81	69.6	98.8	25.8	7.797	69.8	99.4	22.5
8	42	7.705	69.8	98.7	24.6	7.805	69.8	96.7	21.7
9	-0.06	7.687	72.7	97.6	26.3	7.35	71.4	96	23.5
9	0.21	5.844	83.4	95.9	27.2	5.446	98.9	92.9	23.9
9	1.07	5.807	85.4	96.4	26.5	6.194	93.2	80.7	23.9
9	3.13	5.634	98.9	100.6	26.2	6.021	91.7	64.9	23.2
9	7.13	5.138	120.1	97.6	27.8	6.067	89.4	58.9	24.3
9	15.12	4.641	158.2	98.5	26.5	5.701	91.2	72.5	23.5
9	22.16	4.427	180.2	101.4	25.9	5.539	97.5	66.6	22.5
9	30.19	4.154	204	97	24.8	5.375	107	64.8	21.9
9	36.19	4.1	219	98.2	25.9	5.229	112.5	61.8	22.5
9	42.01	3.977	236	97.5	24.3	5.16	118.9	53.5	21.7
10	-0.0625	7.737	72.1	98	25.9	7.235	71.5	95.7	23.4
10	0.215278	8.487	89.2	97.8	26.6	7.891	79.3	97.2	24
10	1.08333	8.231	101.1	97.7	25.9	8.321	82.4	69.9	23.9
10	3.13542	8.157	108.1	100.9	25.8	8.29	83.5	98.4	23.2
10	7.13542	8.154	114.7	99.5	27.9	8.33	85.8	98.7	24.3
10	15.1944	8.158	117.6	99	26.8	8.349	92.3	97.3	23.6
10	22.1667	8.117	118.8	101.5	25.8	8.159	96.8	98	22.6
10	30.1979	8.098	123.3	97.8	24.3	8.205	101.4	94.5	22
10	36.2118	8.061	124.4	98.5	25.9	8.001	104.3	96.8	22.6
10	42.0069	8.117	124.6	98.1	24.8	8.072	105.8	94.7	21.7
11	-0.197779	7.588	76.4	97.9	23.5	7.187	79.4	93.2	21
11	0.0693042	7.49	72.1	98.4	24	7.07	78.8	94.7	21.2
11	1.12139	7.68	69.9	97.4	23.8	7.078	78.2	92.4	20.8
11	2.86805	7.644	67.1	100.9	23.4	7.208	74.9	89.6	20.6
11	6.70139	7.634	66.5	98.8	23.7	6.975	72.8	91.8	20.5
11	12.816	7.66	66.6	98.7	24.1	7.218	72.1	92.7	20.9
11	18.8076	7.642	66.8	100.3	23.5	7.362	72.2	98.1	20.3
11	25.8264	7.526	66.1	100.7	23.7	7.249	70.3	95.5	20.5
11	32.8472	7.344	69.9	69.3	21.8	7.523	66.5	100.5	24.7
11	40.9097	7.419	66.7	98	24.2	7.231	69.2	96	21.1
12	-0.172222	7.546	72.5	97.9	23.7	7.214	78.2	93.3	21
12	0.0673611	7.418	69.3	97.9	24.1	7.131	77.8	94.8	21.2
12	1.11944	7.53	67.3	97.9	24	7.2	77.4	93.6	20.9
12	2.86944	7.639	63.2	101	23.7	7.235	72.7	95.1	20.6
12	6.73611	7.6	62.3	98.8	23.8	6.944	71.6	94.8	20.5
12	12.8174	7.655	62.3	98.6	24.1	7.531	70.5	95	21
12	18.8415	7.616	60.4	100.6	23.5	7.387	69.7	96.6	20.3
12	25.8486	7.545	60.3	100.6	23.5	7.436	68.4	98	20.5
12	32.8903	7.564	60.5	100.3	25.1	7.286	67.6	97.8	21.8
12	40.939	7.46	60.1	98.3	24.7	7.414	67	96.3	21.2
13	-0.145833	7.698	71.9	97.8	23.8	7.174	77.9	93.4	21
13	0.0625	7.426	70.2	97.8	24.2	7.145	77.9	94.5	21.2
13	1.11458	7.564	67.5	97.7	24	7.301	77.8	94	20.8
13	2.85417	7.739	63.9	100.6	23.8	7.413	73.3	96.8	20.5
13	6.72917	7.538	63.8	98.8	23.8	7.277	71.6	96.3	20.5
13	12.8125	7.615	63.4	98.6	24.2	7.567	70.5	96.7	21
13	18.8542	7.686	63	100.5	23.8	7.555	70.5	99.2	20.3
13	25.8646	7.567	63.6	100.3	23.8	7.462	69.5	98.8	20.5
13	32.9062	7.6	64.3	100	25.2	7.439	68.9	99.6	21.8
13	40.9688	7.629	63.7	97.6	25.3	7.514	68.2	97.2	21.2
14	-0.100833	7.564	72.2	97.6	23.5	7.224	78.5	93.9	21
14	0.0583333	7.595	71.4	97.9	23.8	7.188	78.7	94.6	21.1
14	1.10417	7.684	69.2	97.8	23.7	7.402	78.7	94.9	20.8
14	2.69792	7.477	65.1	100.5	23.4	7.133	74.4	96.4	20.4
14	6.71875	7.465	64.8	98.9	23.5	7.14	73	97.1	20.5
14	12.8021	7.572	64.7	98.8	23.9	7.411	71.7	97.5	20.9
14	18.8771	7.759	64.6	100.2	23.4	7.638	71.8	99.7	20.3
14	25.8854	7.564	65.1	100.3	23.7	7.545	70.9	100.1	20.5
14	32.9271	7.646	65.3	100	24.7	7.431	70.2	99.7	21.8
14	41	7.616	64.7	97.8	24.8	7.487	69.4	97.2	21.2

## Sheet: Table DR6
Table DR6: Inorganic dissolved load measurements*
Exp #	Time (days)	Control or Flume	Re (ppt)	Ba (ppm)	Ca (ppm)	Cu (ppm)	Fe (ppm)	K (ppm)	Mg (ppm)	Mn (ppm)	Na (ppm)	Si (ppm)	Sr (ppm)	Zn (ppm)	F- (ppm)	Cl- (ppm)	NO2- (ppm)	NO3- (ppm)	PO43- (ppm)	SO42- (ppm)	HCO3-† (ppm)	TDS (ppm)
1	16.3	Control	4.81182	<det	0.302772	0.0247319	0.475748	1.69402	0.102897	0.0385227	2.59443	1.28288	<det	<det	<det	1.49313	<det	<det	2.77567	1.42585	2.40968	14.6203
1	23.1	Control	-	<det	0.299358	0.0302894	0.635222	1.74075	0.0947224	0.0379258	2.5725	1.48198	<det	<det	<det	1.56991	<det	<det	3.1459	1.52842	1.75474	14.8917
1	27.9	Control	5.67707	<det	0.32349	0.0338305	0.70934	1.77106	0.100624	0.0410328	2.61414	1.64487	<det	<det	<det	1.57835	<det	<det	3.14175	1.5757	2.12474	15.6589
1	0	Flume	-	<det	<det	0.110808	<det	<det	<det	<det	2.57891	<det	<det	1.58581	<det	1.06506	<det	<det	<det		8.18307	13.5237
1	1.94	Flume	3.40846	<det	0.158085	0.0390648	0.316354	1.29017	0.0517456	<det	2.4758	<det	<det	<det	0.0797	1.23472	<det	<det	1.9098	0.934775	2.84236	11.3326
1	7.7	Flume	3.96406	<det	0.203758	0.0472889	0.453527	1.33637	0.0630314	0.0252618	2.52207	1.06417	<det	0.0264993	<det	1.262	<det	<det	2.66902	1.07197	2.22545	12.9704
1	16.3	Flume	4.2613	<det	0.2284	0.0351739	0.50879	1.36403	0.073018	0.0306553	2.56323	1.3066	<det	<det	<det	1.30253	<det	<det	2.68533	1.2549	2.2295	13.5821
1	23.1	Flume	4.64729	<det	0.290583	0.0432275	0.537318	1.37161	0.0846089	0.0353819	2.62749	1.46692	<det	<det	<det	1.40556	<det	<det	2.77557	1.5132	2.06834	14.2198
1	27.9	Flume	4.74376	<det	0.286071	0.0496782	0.558003	1.357	0.0869985	0.037464	2.63049	1.60769	<det	0.023551	<det	1.3626	<det	<det	2.69373	1.6329	2.23752	14.5637
2	0	Control	0.104632	<det	<det	0.0737095	<det	<det	<det	<det	2.38551	<det	<det	0.033303	<det	1.00523	<det	<det	<det		4.80499	8.30275
2	1	Control	1.93667	<det	3.61507	<det	<det	0.457313	1.33164	0.0307376	2.3932	<det	0.0303057	<det	<det	1.05783	<det	<det	<det	17.159	1.25084	27.326
2	5.9	Control	-	<det	5.53774	<det	<det	0.567447	1.94396	0.0525919	2.39145	<det	0.0469188	<det	<det	1.0916	<det	<det	<det	24.0498	1.60669	37.2882
2	15.9	Control	-	<det	8.39091	<det	0.0557346	0.649385	2.54659	0.09441	2.42261	0.973063	0.0711977	<det	<det	1.146	<det	<det	<det	33.8387	1.25021	51.4388
2	25	Control	-	0.0191525	11.542	<det	0.161176	0.693233	3.13314	0.146227	2.43509	<det	0.0997808	0.0285633	0.0599	1.17237	<det	<det	<det	44.8507	0.120351	64.4617
2	35.9	Control	2.70701	0.0289619	14.9707	<det	0.41605	0.746278	3.63767	0.205681	2.45895	<det	0.129177	0.0452126	<det	1.2284	<det	<det	<det	57.0491	0	80.9162
2	0	Flume	0.131939	<det	<det	0.0564611	<det	<det	<det	<det	2.38152	<det	<det	0.0340129	<det	0.967275	<det	<det	<det		4.8279	8.26716
2	1	Flume	2.29778	<det	5.20566	<det	<det	0.452451	1.81273	0.0500753	2.39144	<det	0.0442113	<det	<det	0.977	<det	<det	<det	21.6517	2.9915	35.5767
2	5.9	Flume	-	<det	8.1636	<det	0.0773305	0.493771	2.45404	0.0908642	2.40821	<det	0.0692386	<det	<det	0.989667	<det	<det	<det	31.5047	3.08295	49.3343
2	15.9	Flume	-	0.030027	14.7964	<det	0.378625	0.540435	3.48805	0.199626	2.48793	1.00947	0.127922	0.0461028	<det	1.00103	<det	<det	<det	57.1621	0	81.2678
2	25	Flume	-	0.0512128	19.7239	0.0339841	1.50769	0.581325	4.07826	0.279878	2.553	0.93844	0.173334	0.120767	0.204667	1.0568	<det	<det	<det	78.8491	0	110.152
2	35.9	Flume	3.06495	0.0631769	21.1461	<det	2.91679	0.601803	4.18362	0.304667	2.60556	1.12613	0.188689	0.161673	0.128633	1.08353	<det	<det	<det	93.5359	0	128.046
3	-1.067	Control	4.49413	0.0313803	74.2861	0.135835	<det	2.1449	6.87676	<det	26.4131	7.74282	0.160726	0.0301655	0.1223	36.3341	1.0216	<det	<det	57.8437	196.978	410.121
3	-0.088	Control	4.50613	0.0310356	74.1753	0.130336	<det	2.14916	6.83701	<det	26.4359	7.89873	0.160731	0.0305895	0.112925	36.2581	1.01153	<det	<det	57.7194	196.83	409.781
3	0.006	Control	10.3571	0.0437134	73.5862	0.111436	<det	2.17148	6.81733	<det	26.1778	7.62037	0.213426	0.0202185	0.1199	36.3834	1.03737	<det	<det	58.8816	192.567	405.752
3	0.641	Control	19.7526	0.0562591	73.2147	0.0835669	<det	2.217	6.83635	<det	26.5227	7.83516	0.236276	0.0188486	0.11835	36.5102	0.990375	<det	<det	59.5922	191.452	405.684
3	1.044	Control	22.5308	0.0596788	72.8838	0.067436	<det	2.20403	6.89553	<det	26.473	7.68933	0.23951	0.0135891	0.11555	36.5653	1.01253	<det	<det	60.1438	189.74	404.103
3	3.714	Control	31.6407	0.0658528	71.2183	0.0384523	<det	2.22277	6.93863	<det	26.4247	7.72978	0.241593	<det	0.11545	36.8221	0.987225	<det	<det	61.234	182.92	396.959
3	7.745	Control	36.7865	0.0658508	68.5669	0.0165444	<det	2.20702	6.90433	<det	26.5007	7.42267	0.24067	<det	0.117175	36.9122	0.931325	<det	<det	63.9711	171.245	385.101
3	14.016	Control	39.1483	0.064987	64.5568	<det	<det	2.17611	6.81392	<det	26.3499	7.3921	0.237154	<det	0.11675	37.0516	0.92595	<det	<det	65.3988	156.049	367.133
3	14.672	Control	46.0211	0.0700536	64.8046	<det	<det	2.25551	6.97235	<det	26.5655	7.56275	0.295608	<det	0.117475	37.0635	0.9611	<det	<det	66.4166	157.019	370.105
3	15.112	Control	53.174	0.0726894	64.579	<det	<det	2.24863	6.91279	<det	26.4703	7.31058	0.308661	<det	0.120425	37.1892	0.92635	<det	<det	67.1347	154.698	367.972
3	17.953	Control	64.1329	0.08231	64.6858	<det	<det	2.27206	7.03675	<det	26.7061	7.37506	0.337	<det	0.119125	37.371	0.840275	<det	<det	69.4009	153.283	369.509
3	19.87	Control	69.0622	0.0850566	63.8224	<det	<det	2.29646	7.09119	<det	26.7529	7.31233	0.340912	<det	0.121625	37.4613	0.81515	<det	<det	70.5013	149.57	366.17
3	-1.067	Flume	4.74569	0.0319994	78.0902	0.155257	<det	2.38528	7.26256	<det	30.1389	7.77823	0.169931	0.0487535	0.111575	44.5281	1.1485	<det	<det	63.3377	199.631	434.818
3	-0.088	Flume	4.65928	0.0318323	77.8344	0.129427	<det	2.37955	7.2551	<det	29.899	7.91969	0.169436	0.039658	0.108925	44.48	1.15607	<det	<det	63.2474	198.298	432.949
3	0.006	Flume	11.5762	0.0567146	76.4824	0.0780308	<det	2.41914	7.22552	<det	29.8996	8.04612	0.236754	0.0138484	0.114825	44.5221	1.15518	<det	<det	64.2204	192.739	427.209
3	0.641	Flume	22.7162	0.0610118	59.0095	<det	<det	2.41588	7.09733	<det	30.0236	7.83795	0.232253	<det	0.102325	44.8345	1.16728	<det	<det	64.6421	137.988	355.412
3	1.044	Flume	25.5487	0.0609463	53.5132	<det	<det	2.40523	7.01389	<det	29.6942	7.80781	0.22895	<det	0.107275	44.9657	1.15053	<det	<det	65.1553	119.067	331.17
3	3.714	Flume	34.661	0.0594203	47.0705	<det	<det	2.40722	7.05875	<det	29.9057	7.66069	0.227247	<det	0.10585	45.2285	1.12628	<det	<det	67.0265	97.4426	305.319
3	7.745	Flume	38.2353	0.057599	45.8427	<det	<det	2.37145	6.89926	<det	30.3394	7.34947	0.225202	<det	0.107675	45.2113	1.11108	<det	<det	69.989	90.2745	299.779
3	14.016	Flume	41.7862	0.0574188	47.1511	<det	<det	2.44617	7.19641	<det	30.6271	7.55651	0.23503	<det	0.103875	46.1751	1.09165	<det	<det	72.7987	91.454	306.893
3	14.672	Flume	49.8031	0.0678271	47.3544	<det	<det	2.49003	7.17217	<det	30.6644	7.50385	0.310443	<det	0.1151	46.1823	1.09035	<det	<det	73.9671	90.7022	307.62
3	15.112	Flume	65.8653	0.0765265	47.3182	<det	<det	2.49391	7.22614	<det	30.7654	7.50547	0.323614	<det	0.114225	46.3318	1.06557	<det	<det	75.0787	89.5295	307.829
3	17.953	Flume	72.1624	0.0792865	46.7104	<det	<det	2.48445	7.23955	<det	30.7565	7.34703	0.329469	<det	0.11775	46.3022	0.99935	<det	<det	77.7599	84.4397	304.566
3	19.87	Flume	74.9566	0.0780131	46.3314	0.0152827	<det	2.4552	7.114	<det	30.5084	7.26311	0.32811	0.010219	0.116075	46.0568	1.00275	<det	<det	78.6754	81.2568	301.212
4	-1.9375	Control	-	<det	6.80959	0.0951239	<det	<det	0.553825	<det	3.50011	1.06057	0.0139332	0.0492287	<det	3.44567	<det	<det	<det	4.87397	20.9769	41.3789
4	-0.0708333	Control	-	<det	6.85364	0.0857996	<det	<det	0.546627	<det	3.48735	0.871979	0.0136144	0.0475863	<det	3.4058	<det	<det	<det	4.81897	21.1581	41.2894
4	0.0833333	Control	12.3347	0.0186197	10.9644	<det	<det	0.88554	0.966712	<det	3.40979	0.865047	0.161289	<det	0.06075	3.44967	<det	<det	<det	8.75943	31.6526	61.1939
4	0.916667	Control	24.8885	0.0278174	12.4846	<det	<det	0.954705	1.06247	<det	3.441	1.00186	0.207056	<det	0.055675	3.453	<det	<det	<det	9.9574	35.5136	68.1592
4	4.14583	Control	36.8478	0.0339834	16.0809	<det	<det	0.988462	1.29727	<det	3.55147	1.09022	0.262311	<det	0.061975	3.44697	<det	<det	<det	12.7399	44.5267	84.0802
4	6.88542	Control	42.0698	0.0361815	19.6124	0.0138767	<det	1.01177	1.35676	<det	3.55419	1.12724	0.298089	<det	0.066575	3.45727	<det	<det	<det	15.3246	52.3846	98.2436
4	14.7917	Control	-	0.0388937	25.4889	<det	<det	1.03249	1.55244	<det	3.53602	1.10642	0.360164	<det	0.0682	3.4584	<det	<det	<det	20.4437	64.7963	121.882
4	19.1733	Control	-	0.0381075	26.2605	0.0124892	<det	1.00199	1.57308	<det	3.55347	1.0821	0.362576	<det	0.0686	3.53963	<det	<det	<det	20.9636	66.4734	124.93
4	21.8542	Control	-	0.0397248	27.9787	<det	<det	1.03639	1.66846	<det	3.69056	1.05549	0.386397	<det	0.06805	3.53517	<det	<det	<det	21.4346	72.0232	132.917
4	27.965	Control	50.5319	0.0400736	28.5932	<det	<det	1.02532	1.72612	<det	3.62463	1.11867	0.39257	<det	0.0667	3.5438	<det	<det	<det	22.5067	72.628	135.266
4	35.1229	Control	-	0.039868	29.5719	0.0118207	<det	1.02931	1.73271	<det	3.59613	1.12032	0.385283	<det	0.07105	3.55517	<det	<det	<det	23.4716	74.3247	138.91
4	41.9292	Control	-	0.0398627	30.5772	<det	<det	1.04921	1.78794	<det	3.60098	1.14155	0.391704	<det	0.0698	3.52957	<det	<det	<det	23.8714	77.2336	143.293
4	55.8679	Control	54.3876	0.0401191	31.6551	<det	<det	1.06318	1.83671	<det	3.61461	1.10828	0.391169	<det	0.070125	3.56143	<det	<det	<det	25.4003	78.8199	147.561
4	-1.9375	Flume	-	<det	6.87588	0.0721381	<det	<det	0.51006	<det	3.37662	1.09524	0.0136893	0.0597869	<det	3.4384	<det	<det	<det	4.88983	20.5988	40.9305
4	-0.0708333	Flume	-	<det	7.06182	0.0359092	<det	<det	0.486543	<det	3.32967	0.96147	0.0132418	0.0561382	<det	3.44843	<det	<det	<det	4.919	20.791	41.1032
4	0.0833333	Flume	17.4475	0.0259276	11.4137	0.0114221	<det	0.929916	0.990868	<det	3.38283	0.910483	0.186595	<det	0.059825	3.45133	<det	<det	<det	9.16117	32.693	63.217
4	0.916667	Flume	33.6499	0.0316839	15.3478	<det	<det	0.959946	1.02184	<det	3.2235	1.01738	0.216437	<det	0.0709	3.44767	<det	<det	<det	10.1952	43.1334	78.6657
4	4.14583	Flume	45.7467	0.0385686	24.9936	<det	<det	1.01223	1.33987	<det	3.34651	1.12373	0.32845	<det	0.07845	3.44413	<det	<det	<det	17.4181	65.477	118.601
4	6.88542	Flume	48.756	0.0394216	27.5625	<det	<det	1.03713	1.40466	<det	3.34832	1.0949	0.352246	<det	0.082425	3.44583	<det	<det	<det	19.1998	71.4231	128.99
4	14.7917	Flume	-	0.0414361	29.2245	0.0100613	<det	1.04857	1.59527	<det	3.42656	1.05756	0.391368	<det	0.082775	3.4449	<det	<det	<det	22.1408	74.0061	136.47
4	19.1733	Flume	-	0.0416887	29.4864	0.0096473	<det	1.05695	1.65921	<det	3.47007	1.09024	0.397094	<det	0.08235	3.5068	<det	<det	<det	22.6871	74.4615	137.949
4	21.8542	Flume	-	0.042297	30.2257	0.0138611	<det	1.06841	1.63543	<det	3.5061	1.13096	0.399227	<det	0.0849	3.51833	<det	<det	<det	23.3355	75.8665	140.827
4	27.965	Flume	54.5271	0.0423266	30.2797	0.0122678	<det	1.0735	1.74197	<det	3.56779	1.18214	0.413354	<det	0.0866	3.52217	<det	<det	<det	24.1469	75.7113	141.78
4	35.1229	Flume	-	0.0409052	29.6045	<det	<det	1.09194	1.67639	<det	3.48062	1.2524	0.393465	<det	0.08865	3.53367	<det	<det	<det	24.9658	72.0042	138.133
4	41.9292	Flume	-	0.0415841	30.0522	0.0124706	<det	1.0959	1.77951	<det	3.58664	1.18546	0.411402	<det	0.090175	3.57397	<det	<det	<det	26.209	72.5688	140.607
4	55.8679	Flume	58.53	0.0414757	30.4503	<det	<det	1.11807	1.94309	<det	3.64795	1.21985	0.426781	<det	0.090225	3.60163	<det	<det	<det	28.2506	72.1557	142.946
5	-1.93417	Control	-	<det	7.32009	0.0973582	<det	<det	0.534395	0.0106366	4.26264	0.825443	0.0131253	0.0465314	<det	4.30153	<det	<det	<det	5.52827	22.1752	45.1152
5	-0.121667	Control	-	<det	7.45074	0.0964565	<det	<det	0.538588	0.0118464	4.2921	0.858407	0.0131281	0.0471202	<det	4.29997	<det	<det	<det	5.51997	22.6875	45.8159
5	0.0866667	Control	12.0848	0.0125735	10.7545	0.0299125	<det	<det	0.564716	<det	4.13703	0.898208	0.0388147	<det	<det	4.33447	<det	<det	<det	7.05043	30.2681	58.0887
5	0.95125	Control	19.5787	0.0153851	11.8385	0.0123019	<det	<det	0.602634	<det	4.07171	0.836343	0.0516324	<det	<det	4.35003	<det	<det	<det	8.16613	32.1283	62.073
5	4.03458	Control	26.689	0.0189602	13.8894	0.0147782	<det	<det	0.573179	<det	3.793	0.885178	0.067718	<det	<det	4.34567	<det	<det	<det	10.1455	35.0089	68.7423
5	7.92	Control	32.8178	0.0247348	17.7431	0.0124391	<det	<det	0.741028	<det	4.07405	0.89036	0.110918	<det	<det	4.35493	<det	<det	<det	12.7558	45.0603	85.7676
5	14.6575	Control	-	0.027792	21.94	<det	<det	0.505644	0.916623	0.0097318	4.3331	1.02479	0.159381	<det	<det	4.3609	<det	<det	<det	15.2675	57.0647	105.61
5	21.7117	Control	-	0.0272951	23.73	0.0133259	<det	0.50351	0.93079	0.010773	4.22188	0.990681	0.171685	<det	<det	4.36073	<det	<det	<det	16.1393	61.225	112.325
5	27.8225	Control	38.7567	0.028587	25.324	<det	<det	0.512434	0.960957	0.0112297	4.24773	0.941757	0.188736	<det	<det	4.36057	<det	<det	<det	17.1468	65.0336	118.756
5	34.9804	Control	-	0.0284779	26.5061	0.0101196	<det	0.516731	1.01049	0.0120617	4.26998	1.08029	0.201844	<det	<det	4.3643	<det	<det	<det	18.1206	67.7432	123.864
5	41.7867	Control	-	0.0287301	27.5433	<det	<det	0.536426	1.06848	0.0122028	4.39933	1.04895	0.212665	<det	<det	4.32063	<det	<det	<det	18.6901	70.9146	128.775
5	55.9617	Control	42.7204	0.0293493	29.0288	<det	<det	0.535421	1.10138	0.0115657	4.22402	1.04507	0.221315	<det	<det	4.3504	<det	<det	<det	20.313	73.0342	133.895
5	-1.93417	Flume	-	<det	7.94656	0.0668174	<det	<det	0.535316	<det	4.36075	0.856613	0.0140081	0.0552343	<det	4.60047	<det	<det	<det	5.84313	23.3684	47.6473
5	-0.121667	Flume	-	<det	7.74383	0.0573712	<det	<det	0.498872	<det	4.20168	0.877944	0.0133165	0.0557599	<det	4.62153	<det	<det	<det	5.8773	22.0482	45.9958
5	0.0866667	Flume	16.5239	0.0168414	12.1095	0.0160931	<det	<det	0.587049	<det	4.3295	0.885763	0.0548192	<det	0.0544667	4.66963	<det	<det	<det	7.4671	33.7352	63.926
5	0.95125	Flume	26.4868	0.0244778	17.55	<det	<det	<det	0.681636	<det	4.29137	0.967175	0.112696	<det	0.0602333	4.67587	<det	<det	<det	8.4654	49.434	86.2629
5	4.03458	Flume	34.2414	0.0297847	24.8912	0.00968568	<det	0.526353	0.862797	<det	4.42618	0.997876	0.202456	<det	0.0650667	4.68207	<det	<det	<det	13.7798	67.2468	117.72
5	7.92	Flume	36.7421	0.031361	27.3889	<det	<det	0.554577	0.969523	<det	4.51939	0.992329	0.233567	<det	0.0669	4.68367	<det	<det	<det	15.8868	73.0204	128.347
5	14.6575	Flume	-	0.0314054	28.3193	0.0121599	<det	0.560382	1.05481	<det	4.57275	1.10946	0.251587	<det	0.0686667	4.7032	<det	<det	<det	18.0512	73.692	132.427
5	21.7117	Flume	-	0.0320928	28.8816	<det	<det	0.572492	1.15292	<det	4.62817	1.11419	0.261452	<det	0.0719667	4.66923	<det	<det	<det	19.0916	74.7798	135.255
5	27.8225	Flume	42.8989	0.0327669	29.7373	<det	<det	0.58651	1.15871	<det	4.64903	1.00817	0.262176	<det	0.0689667	4.67923	<det	<det	<det	20.151	76.1398	138.474
5	34.9804	Flume	-	0.0323995	29.0068	0.013085	<det	0.575484	1.18035	<det	4.65236	1.01506	0.262444	<det	0.0702333	4.6893	<det	<det	<det	21.3399	72.5094	135.347
5	41.7867	Flume	-	0.0317216	29.4261	0.0107321	<det	0.590968	1.19828	<det	4.64036	1.15951	0.263267	<det	0.0728333	4.7008	<det	<det	<det	22.4006	72.4886	136.984
5	55.9617	Flume	47.5205	0.0317459	30.2446	0.00960597	<det	0.606445	1.29341	<det	4.7358	1.08905	0.268366	<det	0.0754	4.76107	<det	<det	<det	24.9364	72.4076	140.46
6	-0.125	Control	-	<det	6.93533	0.0720994	<det	<det	0.497879	<det	3.66628	0.834534	0.0122215	0.0367415	<det	3.66977	<det	<det	<det	5.1287	20.7407	41.5942
6	0.0766667	Control	8.67782	<det	7.64522	0.0733699	<det	<det	0.571126	<det	3.74727	0.767673	0.0275291	0.0394978	<det	3.69003	<det	<det	<det	6.2895	22.0044	44.8556
6	0.944583	Control	18.7113	<det	8.27091	0.0589137	<det	<det	0.571448	<det	3.63271	0.877655	0.0416399	0.030709	<det	3.7311	<det	<det	<det	7.52877	21.9376	46.6814
6	4.8475	Control	28.519	0.0174335	9.81749	0.0408663	<det	<det	0.69698	<det	3.69091	0.897484	0.0774716	<det	<det	3.71387	<det	<det	<det	9.10213	25.4359	53.4906
6	10.91	Control	36.4021	0.0237882	12.8032	0.0202594	<det	<det	0.769654	<det	3.5736	0.801935	0.11671	<det	<det	3.73907	<det	<det	<det	12.0768	30.7791	64.7041
6	14.6392	Control	-	0.0270917	14.7127	0.0254963	<det	<det	0.891776	<det	3.72457	0.832005	0.143308	<det	<det	3.74213	<det	<det	<det	13.5328	35.8024	73.4342
6	21.7017	Control	-	0.0299047	17.2441	0.0122468	<det	0.507561	0.99454	0.00958222	3.80673	0.894211	0.168417	<det	<det	3.75773	<det	<det	<det	15.0181	43.1558	85.5989
6	27.7917	Control	41.7653	0.0295709	19.0068	<det	<det	0.513045	1.00764	0.00983817	3.78454	0.90401	0.178783	<det	<det	3.76613	<det	<det	<det	16.5038	46.6279	92.3321
6	34.9496	Control	-	0.0295208	20.7133	0.0144755	<det	0.514974	1.08344	0.009753	3.77239	0.885429	0.196959	<det	<det	3.77173	<det	<det	<det	18.1735	50.0977	99.2632
6	41.7558	Control	-	0.0313395	22.3572	0.0159623	<det	0.526562	1.16397	0.0105731	3.79082	0.936152	0.215635	<det	<det	3.7807	<det	<det	<det	19.5281	53.8706	106.228
6	55.9517	Control	45.5646	0.0320717	24.8781	<det	<det	0.535806	1.29617	0.0121635	3.82373	1.01906	0.245703	<det	<det	3.71923	<det	<det	<det	21.4622	59.9763	117.001
6	-0.125	Flume	-	<det	7.11532	0.0456324	0.0520363	<det	0.484992	<det	3.8277	0.851568	0.0128078	0.0482781	<det	3.94327	<det	<det	<det	5.38633	20.9397	42.7077
6	0.0766667	Flume	13.7969	0.0134442	10.7617	0.0144594	<det	<det	0.64791	<det	4.21047	0.80664	0.077322	<det	<det	3.98297	<det	<det	<det	7.1126	31.4532	59.0807
6	0.944583	Flume	28.1681	0.0275129	15.7306	0.0105819	<det	0.537961	0.804244	<det	4.02289	0.847635	0.15448	<det	<det	3.95627	<det	<det	<det	9.78847	44.469	80.3496
6	4.8475	Flume	41.5857	0.0359816	29.2894	0.0113101	<det	0.693799	1.09005	<det	4.02194	0.921235	0.324518	<det	0.0664	3.9709	<det	<det	<det	17.8912	77.1439	135.461
6	10.91	Flume	47.05	0.0346715	30.9978	0.0338384	<det	0.752106	1.22037	<det	4.01583	0.808793	0.362408	<det	0.0737	3.96887	<det	<det	<det	25.7643	73.1483	141.181
6	14.6392	Flume	-	0.034439	32.9354	0.00971045	<det	0.800568	1.35099	<det	4.13269	0.885069	0.398601	<det	0.0896	3.99473	<det	<det	<det	29.1841	75.6535	149.469
6	21.7017	Flume	-	0.0347684	33.2583	0.0188034	<det	0.828064	1.46671	<det	4.22565	0.939819	0.42088	<det	0.0777	4.02043	<det	<det	<det	33.1361	72.5297	150.957
6	27.7917	Flume	51.8264	0.0339858	33.752	0.0208087	<det	0.84208	1.50687	<det	4.22117	0.876071	0.429725	<det	0.0844	4.0652	<det	<det	<det	36.6419	69.7078	152.182
6	34.9496	Flume	-	0.0322307	33.9674	0.029422	<det	0.862025	1.54072	<det	4.20054	0.81041	0.433495	<det	0.0784333	4.00087	<det	<det	<det	38.8273	67.884	152.667
6	41.7558	Flume	-	0.0323415	35.026	0.0170191	<det	0.896975	1.60906	<det	4.26382	0.962733	0.443911	<det	0.0798333	4.01693	<det	<det	<det	40.7789	69.1525	157.28
6	55.9517	Flume	60.1328	0.0322058	36.1677	<det	<det	0.946301	1.75703	<det	4.35894	0.895185	0.468766	<det	0.0813333	4.09667	<det	<det	<det	43.7233	69.8204	162.348
7	0	Control	0.642676	<det	7.49934	0.124467	<det	0.200878	0.618391	0.0109015	4.5718	0.913797	0.014382	0.0120117	<det	4.4628	<det	<det	<det	5.74063	23.7194	47.8888
7	1.04	Control	-	<det	7.43843	0.124551	<det	0.207966	0.612126	0.0118835	4.53375	0.913882	0.0142702	0.0107152	<det	4.4557	<det	<det	<det	5.7259	23.4432	47.4924
7	2.98625	Control	0.676409	-	-	-	-	-	-	-	-	-	-	-	-	-	-	-	-	-
7	6.99	Control	-	<det	7.51019	0.115279	<det	0.234784	0.619496	0.0142345	4.5627	0.915473	0.0143999	0.010751	<det	4.50377	<det	<det	<det	5.74087	23.7034	47.9453
7	13.0696	Control	0.681078	-	-	-	-	-	-	-	-	-	-	-	-	-	-	-	-	-
7	21.997	Control	-	<det	7.65339	0.0982981	<det	0.255168	0.62238	0.0159144	4.59294	0.937928	0.0146694	<det	<det	4.46433	<det	<det	<det	5.67807	24.365	48.6981
7	41.87	Control	0.675225	<det	7.54706	0.100424	<det	0.276743	0.62494	0.0168546	4.61884	0.936243	0.0144296	0.0120347	<det	4.5743	<det	<det	<det	5.80243	23.8376	48.3619
7	0	Flume	0.674632	<det	7.83325	0.0693243	<det	0.203804	0.628609	<det	4.63512	0.935738	0.0150035	0.0113517	<det	4.47607	<det	<det	<det	5.736	24.8126	49.3569
7	1.04	Flume	-	<det	7.68921	0.0624804	<det	0.20484	0.618882	<det	4.58012	0.9232	0.0148447	0.0112716	<det	4.5286	<det	<det	<det	5.75652	24.0508	48.4408
7	2.98625	Flume	0.690372	-	-	-	-	-	-	-	-	-	-	-	-	-	-	-	-	-
7	6.99	Flume	-	<det	7.83114	0.0625495	<det	0.213628	0.631604	<det	4.64569	0.96382	0.0151274	0.0103043	<det	4.57087	<det	<det	<det	5.8166	24.5843	49.3456
7	13.0696	Flume	0.704463	-	-	-	-	-	-	-	-	-	-	-	-	-	-	-	-	-
7	21.997	Flume	-	<det	8.0641	0.0472754	<det	0.224521	0.645648	<det	4.74767	0.968126	0.0156446	0.00954049	<det	4.63333	<det	<det	<det	5.84933	25.4727	50.6779
7	41.87	Flume	0.746153	<det	8.16992	0.0492557	<det	0.246429	0.654357	<det	4.83944	0.986324	0.0159416	0.0111616	<det	4.8269	<det	<det	<det	6.02945	25.5616	51.3908
8	-0.08	Control	0.67998	<det	7.41849	0.115023	<det	0.195473	0.611524	<det	4.66147	0.921929	0.0142205	<det	<det	4.65113	<det	<det	<det	5.72553	23.2984	47.6131
8	0.2	Control	-	<det	7.48421	0.105335	<det	0.201876	0.618103	<det	4.65287	0.918193	0.0142682	0.0106545	<det	4.59913	<det	<det	<det	5.7645	23.56	47.9291
8	1.01	Control	-	<det	7.51104	0.105208	<det	0.209399	0.615517	<det	4.70898	0.904839	0.0144019	0.00995197	<det	4.57677	<det	<det	<det	5.75187	23.8425	48.2505
8	3.11	Control	0.680788	<det	7.43543	0.0985525	<det	0.213738	0.617839	<det	4.6185	0.931271	0.014451	<det	<det	4.5789	<det	<det	<det	5.75837	23.3474	47.6145
8	7.11	Control	-	<det	7.59996	0.0950001	<det	0.231788	0.622405	<det	4.6734	0.953794	0.0147727	<det	<det	4.59657	<det	<det	<det	5.7589	24.0077	48.5543
8	15.2	Control	0.684491	<det	7.52995	0.0825602	<det	0.236736	0.624421	<det	4.7124	0.950953	0.0148346	0.00976676	<det	4.62263	<det	<det	<det	5.752	23.8742	48.4105
8	22.15	Control	-	<det	7.62883	0.0713607	<det	0.242021	0.626828	<det	4.70434	0.954598	0.0150443	<det	<det	4.52313	<det	<det	<det	5.65707	24.4267	48.8499
8	30.18	Control	-	<det	7.58197	0.0753813	<det	0.251132	0.620515	<det	4.71214	0.963641	0.0150813	<det	<det	4.6403	<det	<det	<det	5.7822	23.9343	48.5767
8	36.17	Control	-	<det	7.5909	0.0731406	<det	0.28671	0.619376	<det	4.71603	0.989682	0.015112	0.00960254	<det	4.65457	<det	<det	<det	5.83453	23.9443	48.7339
8	42	Control	0.704622	<det	7.55971	0.0684824	<det	0.29292	0.623619	<det	4.70658	0.964461	0.0150591	0.0100175	<det	4.68243	<det	<det	<det	5.766	23.8861	48.5754
8	-0.08	Flume	0.647041	<det	7.54972	0.0650472	<det	0.193955	0.604156	<det	4.49962	0.90002	0.0153831	0.00986314	<det	4.25563	<det	<det	<det	5.57545	24.0244	47.6932
8	0.2	Flume	-	<det	7.60897	0.0581644	<det	0.19772	0.606477	<det	4.48625	0.929424	0.0156166	0.00984357	<det	4.26363	<det	<det	<det	5.57627	24.1591	47.9115
8	1.01	Flume	-	<det	7.55565	0.0484695	<det	0.203275	0.606166	<det	4.48176	0.934963	0.0156783	<det	<det	4.27837	<det	<det	<det	5.58558	23.9179	47.6278
8	3.11	Flume	0.817758	<det	7.54926	0.0342041	<det	0.20195	0.597496	<det	4.44438	0.968948	0.0158194	<det	<det	4.29023	<det	<det	<det	5.57717	23.7166	47.3961
8	7.11	Flume	-	<det	7.61382	0.0240227	<det	0.211753	0.611246	<det	4.50687	0.950894	0.0162052	<det	<det	4.29343	<det	<det	<det	5.61153	24.0953	47.935
8	15.2	Flume	1.3669	<det	7.58051	0.0160476	<det	0.217243	0.60465	0.00973956	4.49031	0.991306	0.0163503	<det	<det	4.37147	<det	<det	<det	5.6268	23.7781	47.7025
8	22.15	Flume	-	<det	7.61367	0.0176937	<det	0.216962	0.604423	0.0131064	4.51581	0.984005	0.0164687	<det	<det	4.29097	<det	<det	<det	5.56847	24.1687	48.0103
8	30.18	Flume	-	<det	7.68998	0.0124622	<det	0.224617	0.614255	0.0167003	4.51926	0.996229	0.0166903	<det	<det	4.32677	<det	<det	<det	5.62257	24.3394	48.3789
8	36.17	Flume	-	<det	7.74713	0.0113335	<det	0.23569	0.620947	0.0191252	4.58967	1.01654	0.0170002	<det	<det	4.7859	<det	<det	<det	5.95277	23.5452	48.5413
8	42	Flume	2.78053	<det	7.80454	<det	<det	0.236895	0.623301	0.0204844	4.59565	1.02773	0.0170754	<det	<det	4.39253	<det	<det	<det	5.70417	24.7237	49.1461
9	-0.06	Control	0.61693	<det	7.62373	0.0989656	<det	0.21265	0.627429	<det	4.54261	0.918657	0.0145879	0.0110051	<det	4.5553	<det	<det	<det	6.18483	23.2862	48.0759
9	0.21	Control	1.8859	<det	7.83825	0.0136321	<det	0.430542	1.71844	0.0308994	4.51221	0.932046	0.0424463	<det	<det	4.56373	<det	<det	<det	16.9955	15.8516	52.9294
9	1.07	Control	2.08489	<det	7.90512	0.0172605	<det	0.467756	1.83958	0.0373474	4.50159	0.98002	0.0468407	<det	<det	4.5851	<det	<det	<det	20.0238	12.8371	53.2415
9	3.13	Control	-	<det	7.37606	0.0113373	<det	0.491616	1.82893	0.0388996	4.52989	1.03317	0.0468004	<det	<det	4.58403	<det	<det	<det	21.329	9.62082	50.8905
9	7.13	Control	2.03223	<det	7.13502	0.0152245	0.021259	0.500771	1.75888	0.0412016	4.50584	1.06159	0.0460604	<det	<det	4.63267	<det	<det	<det	22.6051	6.83886	49.1624
9	15.12	Control	-	<det	7.35753	<det	0.0313142	0.534334	1.83129	0.0478187	4.54054	1.13075	0.0490495	<det	<det	4.65987	<det	<det	<det	26.0228	3.64738	49.8527
9	22.16	Control	2.10684	<det	7.99607	<det	0.0385083	0.537729	1.89758	0.0567496	4.5398	1.14599	0.0531607	<det	<det	4.6172	<det	<det	<det	28.6562	2.69733	52.2363
9	30.19	Control	-	<det	9.01273	0.0171849	0.0489569	0.562358	2.08814	0.0695938	4.54941	1.11764	0.0595391	<det	<det	4.69773	<det	<det	<det	32.6324	1.71713	56.5728
9	36.19	Control	-	<det	9.73096	0.0130513	0.0607665	0.589162	2.15025	0.079517	4.53741	1.1658	0.064304	<det	<det	4.66167	<det	<det	<det	34.6872	1.72417	59.4643
9	42.01	Control	2.19008	<det	10.3464	0.0119525	0.0808179	0.611392	2.28889	0.0896183	4.56599	1.16806	0.0697278	<det	<det	4.73827	<det	<det	<det	37.6398	0.59369	62.2045
9	-0.06	Flume	0.641846	<det	7.70672	0.056384	<det	0.215143	0.626959	<det	4.72094	0.92586	0.0151823	<det	<det	4.59233	<det	<det	<det	6.0627	24.0036	48.9258
9	0.21	Flume	2.07017	<det	5.97086	0.0113999	0.0301895	0.481615	1.62412	0.0336952	4.64661	0.99008	0.0409841	<det	<det	4.6274	<det	<det	<det	19.8191	6.49784	44.7739
9	1.07	Flume	2.2001	<det	6.23115	<det	0.0440401	0.510581	1.68749	0.0354374	4.74835	1.11747	0.0427414	<det	<det	4.64213	<det	<det	<det	22.7691	4.16554	45.9941
9	3.13	Flume	-	<det	8.17636	0.0162773	0.152145	0.639276	1.96663	0.0533675	4.76097	1.13171	0.0567741	<det	<det	4.66197	<det	<det	<det	29.4271	3.55919	54.6017
9	7.13	Flume	2.25947	<det	10.6946	0.0159319	0.0717592	0.537022	2.29822	0.0809201	4.74131	1.20506	0.0741994	<det	<det	4.6594	<det	<det	<det	38.2319	1.40847	64.0188
9	15.12	Flume	-	0.0152128	15.2013	0.0138617	0.178369	0.564133	2.81582	0.138065	4.7393	1.19301	0.103973	<det	<det	4.64893	<det	<det	<det	53.7449	0	83.3568
9	22.16	Flume	2.53141	0.0231317	17.3154	0.0147906	0.320568	0.575641	2.96341	0.166771	4.75789	1.22434	0.118893	0.014202	<det	4.673	<det	<det	<det	62.1034	0	94.2714
9	30.19	Flume	-	0.0287161	19.4688	0.0163429	0.509616	0.596389	3.18471	0.192584	4.79494	1.2397	0.133795	0.0149507	<det	4.64437	<det	<det	<det	68.9057	0	103.731
9	36.19	Flume	-	0.0355212	20.4476	0.0172218	0.662479	0.610331	3.22967	0.205453	4.83544	1.25818	0.142336	0.0163959	<det	4.69643	<det	<det	<det	74.5943	0	110.751
9	42.01	Flume	2.72342	0.0391045	21.3554	0.0108862	0.780039	0.623606	3.31128	0.216967	4.83148	1.27587	0.149055	0.0209055	<det	4.70773	<det	<det	<det	78.8528	0	116.175
10	-0.0625	Control	0.58841	<det	7.68108	0.0949564	<det	0.214426	0.63055	<det	4.52926	0.92384	0.014599	<det	<det	4.22547	<det	<det	<det	5.70653	24.5909	48.6116
10	0.215278	Control	0.607906	0.0153293	8.36681	0.0163325	<det	0.4149	0.761788	0.0220287	4.5728	0.93776	0.0333606	<det	<det	4.1646	<det	<det	<det	5.77253	27.7248	52.803
10	1.08333	Control	0.650841	0.0204696	9.09115	0.016297	<det	0.424529	0.793916	0.0216957	4.55568	0.966851	0.0385326	<det	<det	4.22383	<det	<det	<det	5.93093	29.769	55.8529
10	3.13542	Control	-	0.0266016	9.75882	0.0139291	<det	0.430188	0.804942	0.0207423	4.56951	0.987726	0.0416663	<det	<det	4.22027	<det	<det	<det	5.9487	31.8896	58.7127
10	7.13542	Control	0.613427	0.0324468	10.3986	0.0168089	<det	0.434372	0.825247	0.0194842	4.57218	1.03678	0.0432792	<det	<det	4.24997	<det	<det	<det	5.98947	33.8605	61.4791
10	15.1944	Control	-	0.0422453	11.6603	0.0174046	<det	0.446693	0.853558	0.0131165	4.56629	1.04763	0.0469117	<det	<det	4.25747	<det	<det	<det	6.0198	37.7975	66.7689
10	22.1667	Control	0.672028	0.0479093	12.6984	<det	<det	0.452675	0.887992	<det	4.63654	1.05969	0.0500292	<det	<det	4.23193	0.165	<det	<det	5.99957	41.1245	71.3542
10	30.1979	Control	-	0.050354	13.5069	0.01399	<det	0.460603	0.890832	<det	4.58503	1.07519	0.0513202	<det	<det	4.2203	<det	0.252567	<det	5.97757	43.5254	74.6101
10	36.2118	Control	-	0.0531902	14.0983	0.0131085	<det	0.475197	0.920164	<det	4.65926	1.08494	0.052933	<det	<det	4.24643	<det	0.346733	<det	6.0279	45.4946	77.4728
10	42.0069	Control	0.655351	0.054266	14.326	0.0124065	<det	0.474187	0.907378	<det	4.64538	1.09899	0.0531817	<det	<det	4.23987	<det	0.355933	<det	6.01767	46.1007	78.286
10	-0.0625	Flume	0.599039	<det	7.77589	0.0478096	<det	0.197148	0.627082	<det	4.53462	0.917305	0.0153908	<det	<det	4.19097	<det	<det	<det	5.67645	24.8576	48.8402
10	0.215278	Flume	0.625087	0.0215522	10.3926	0.0116594	<det	0.421902	0.81026	0.0194323	4.56704	0.97334	0.0421554	<det	<det	4.16613	<det	<det	<det	5.8757	34.0014	61.3032
10	1.08333	Flume	0.668926	0.0338606	12.6983	0.0156575	<det	0.434829	0.871624	0.0386892	4.57445	1.00067	0.0493161	<det	<det	4.17073	<det	<det	<det	5.94667	41.3433	71.1781
10	3.13542	Flume	-	0.0454513	14.6034	0.0169236	<det	0.445142	0.905085	0.054004	4.60425	1.02825	0.0540798	<det	<det	4.17597	<det	<det	<det	5.98487	47.4033	79.3207
10	7.13542	Flume	0.662689	0.056828	16.1771	0.0148804	<det	0.443729	0.935604	0.0646163	4.62894	1.06499	0.0567524	<det	<det	4.1831	<det	<det	<det	5.97153	52.4498	86.0479
10	15.1944	Flume	-	0.0680363	16.842	0.0168302	<det	0.450888	0.955603	0.0556807	4.62358	1.09948	0.0587948	<det	<det	4.19667	<det	<det	<det	6.02693	54.4746	88.8691
10	22.1667	Flume	0.722947	0.0727564	17.2988	<det	<det	0.458219	0.984967	0.0464231	4.67059	1.13368	0.0602843	<det	<det	4.16333	0.195733	<det	<det	6.01357	55.9172	91.0156
10	30.1979	Flume	-	0.0746542	17.6487	0.0131194	<det	0.466176	0.993251	0.0293672	4.75156	1.11694	0.0613582	<det	<det	4.2876	<det	0.369033	<det	6.16683	56.7299	92.7084
10	36.2118	Flume	-	0.0751619	17.7963	0.0137332	<det	0.475977	1.00365	0.0101746	4.76477	1.14942	0.0614538	<det	<det	4.30903	<det	0.414033	<det	6.19387	57.1256	93.3931
10	42.0069	Flume	0.76202	0.0761287	17.9664	0.0100886	<det	0.485731	1.01077	<det	4.80271	1.17701	0.0625292	<det	<det	4.31867	<det	0.45335	<det	6.25103	57.6401	94.2545
11	-0.197779	Control	-	<det	7.98924	0.0864462	<det	0.227815	0.667884	<det	5.33295	0.935283	<det	<det	<det	4.93435	<det	<det	<det	6.73062	25.3129	52.2175
11	0.0693042	Control	-	<det	6.55477	0.0148763	<det	0.629652	1.18455	0.0152798	5.28655	1.07484	0.0408267	<det	<det	4.9426	<det	<det	<det	6.71467	24.0026	50.4612
11	1.12139	Control	-	<det	6.43289	0.0156603	<det	0.618293	1.17636	0.0361702	5.24943	1.26657	0.0409441	<det	<det	4.94767	<det	<det	<det	6.77107	23.4418	49.9969
11	2.86805	Control	-	<det	6.49138	0.0131577	<det	0.63659	1.20121	0.0462787	5.2906	1.43101	0.0415047	<det	<det	4.9542	<det	<det	<det	6.7365	23.9336	50.776
11	6.70139	Control	-	<det	6.2769	0.0126744	<det	0.614437	1.15535	<det	5.22865	1.52647	0.0394717	<det	<det	4.90827	<det	<det	<det	6.69647	22.8747	49.3333
11	12.816	Control	-	<det	6.10884	0.0135655	<det	0.634889	1.12518	<det	5.19678	1.66484	0.0384624	<det	<det	4.92507	<det	<det	<det	6.72603	22.0926	48.5263
11	18.8076	Control	-	<det	6.17832	<det	<det	0.633183	1.13735	<det	5.2383	1.74373	0.0386888	<det	<det	5.16467	0.140967	0.2121	<det	6.55337	21.8584	48.899
11	25.8264	Control	-	<det	6.17338	<det	<det	0.606011	1.13489	<det	5.19304	1.8598	0.0386919	<det	<det	5.17298	0.993733	0.281883	<det	6.55767	20.449	48.461
11	32.8472	Control	-	<det	6.11094	<det	<det	0.606556	1.11479	<det	5.22026	1.96545	0.0383134	<det	<det	4.9365	<det	0.9269	<det	6.7014	21.1382	48.7593
11	40.9097	Control	-	<det	5.93543	0.0115175	<det	0.603348	1.09703	<det	5.16173	2.06546	0.0372552	<det	<det	4.9781	<det	1.46797	<det	6.74567	19.7146	47.8181
11	-0.197779	Flume	-	<det	7.72935	0.0605682	<det	0.202249	0.639237	<det	5.11655	0.894863	<det	<det	<det	4.68833	<det	<det	<det	6.5274	24.3954	50.2539
11	0.0693042	Flume	-	<det	5.72597	0.0148909	<det	0.613433	1.07948	<det	5.09798	1.12179	0.0366265	<det	<det	4.68653	<det	<det	<det	6.51997	21.0739	45.9706
11	1.12139	Flume	-	<det	5.4251	0.0131274	<det	0.596434	1.02707	0.0242352	5.07455	1.39708	0.0346109	<det	<det	4.69267	<det	<det	<det	6.55927	19.7931	44.6373
11	2.86805	Flume	-	<det	5.39396	0.0146287	<det	0.601281	1.02542	0.0285008	5.07006	1.53058	0.0344179	<det	<det	4.70877	<det	<det	<det	6.5678	19.6592	44.6346
11	6.70139	Flume	-	<det	5.35234	0.0114834	<det	0.602175	1.00977	0.0117856	5.09149	1.76042	0.0340272	<det	<det	4.71623	<det	<det	<det	6.5943	19.4219	44.6059
11	12.816	Flume	-	<det	5.29534	0.0139009	<det	0.616893	0.997491	<det	5.13372	2.05869	0.0336996	<det	<det	4.764	<det	<det	<det	6.65197	19.1443	44.71
11	18.8076	Flume	-	<det	5.40493	<det	<det	0.622525	1.02183	<det	5.17144	2.2788	0.0342784	<det	<det	5.0701	0.485133	0.1962	<det	6.5099	18.5004	45.2955
11	25.8264	Flume	-	<det	5.4503	<det	<det	0.592471	1.02991	<det	5.22053	2.51144	0.0345482	<det	<det	5.02392	0.1118	1.4643	<det	6.60028	17.9748	46.0143
11	32.8472	Flume	-	<det	5.43187	<det	<det	0.596416	1.03163	<det	5.22638	2.74832	0.0346398	<det	<det	4.91917	<det	1.6177	<det	6.86267	17.7934	46.2622
11	40.9097	Flume	-	<det	5.49065	0.0132412	<det	0.606563	1.03927	<det	5.38235	2.95822	0.0349628	<det	<det	4.98937	<det	2.10135	<det	6.9314	17.7823	47.3297
12	-0.172222	Control	-	<det	7.77858	0.0827016	<det	0.222319	0.65107	<det	5.21689	0.944035	<det	<det	<det	5.01262	<det	<det	<det	6.34662	24.6163	50.8712
12	0.0673611	Control	-	<det	6.7127	0.0312357	<det	0.475513	1.05435	0.0870065	5.26135	1.04455	0.0342937	<det	<det	5.02237	<det	<det	<det	6.23303	24.1785	50.1349
12	1.11944	Control	-	<det	6.47759	0.0217443	<det	0.486992	1.13802	0.106557	5.26489	1.19731	0.0381381	<det	<det	5.04997	<det	<det	<det	6.26303	23.855	49.8993
12	2.86944	Control	-	<det	6.24244	0.020408	<det	0.497553	1.16296	0.110758	5.23983	1.38352	0.039259	<det	<det	5.03837	<det	<det	<det	6.2382	23.274	49.2473
12	6.73611	Control	-	<det	6.0815	0.0142915	<det	0.504829	1.19243	0.0902782	5.24716	1.49867	0.0404994	<det	<det	5.03733	<det	<det	<det	6.2723	22.8657	48.845
12	12.8174	Control	-	<det	5.85768	0.0162388	<det	0.51059	1.1708	0.0485652	5.21059	1.6138	0.0394271	<det	<det	5.0324	<det	<det	<det	6.25847	21.9232	47.6818
12	18.8415	Control	-	<det	5.88141	<det	<det	0.505492	1.15823	0.0181396	5.21964	1.70911	0.0392552	<det	<det	5.30638	0.196175	<det	<det	6.35805	20.9912	47.3831
12	25.8486	Control	-	<det	5.8005	<det	<det	0.480161	1.14567	<det	5.17998	1.76444	0.0384667	<det	<det	5.33782	0.429425	<det	<det	6.35168	20.1402	46.6683
12	32.8903	Control	-	<det	5.69427	<det	<det	0.484321	1.12741	<det	5.15727	1.794	0.0377164	<det	<det	5.34098	0.2606	0.822133	<det	6.40123	19.0167	46.1366
12	40.939	Control	-	<det	5.58206	<det	<det	0.49182	1.10973	<det	5.15252	1.83999	0.0370977	<det	<det	5.08403	<det	0.651167	<det	6.27373	19.7026	45.9247
12	-0.172222	Flume	-	<det	7.38101	0.0394249	<det	<det	0.605512	<det	4.76089	0.899889	<det	<det	<det	4.37373	<det	<det	<det	5.77167	23.3667	47.1988
12	0.0673611	Flume	-	<det	5.58126	0.0121059	<det	0.463685	1.10642	0.0903671	4.81562	1.14214	0.0374679	<det	<det	4.37857	<det	<det	<det	5.74933	21.491	44.868
12	1.11944	Flume	-	<det	5.24502	0.0126832	<det	0.454382	1.05467	0.0805285	4.79294	1.38101	0.0353571	<det	<det	4.38087	<det	<det	<det	5.78877	20.055	43.2812
12	2.86944	Flume	-	<det	5.17539	0.0108454	<det	0.459801	1.02085	0.076826	4.81076	1.48415	0.0348113	<det	<det	4.38677	<det	<det	<det	5.77803	19.7198	42.9581
12	6.73611	Flume	-	<det	5.03803	0.0114984	<det	0.457021	1.00724	0.0625856	4.76554	1.62125	0.0338446	<det	<det	4.4099	<det	<det	<det	5.81743	18.9873	42.2117
12	12.8174	Flume	-	<det	4.8991	0.0132431	0.0605088	0.476049	0.991463	<det	4.7804	1.83824	0.0331532	<det	<det	4.39223	<det	<det	<det	5.74767	18.6688	41.9008
12	18.8415	Flume	-	<det	4.92842	<det	0.064365	0.447115	1.00455	<det	4.76523	1.93633	0.0328897	<det	<det	4.61788	0.869825	<det	<det	5.88398	17.0058	41.5564
12	25.8486	Flume	-	<det	4.94317	<det	0.0950001	0.447711	1.00615	<det	4.76389	2.10642	0.0329569	<det	<det	4.64733	0.87895	0.327083	<det	5.94345	16.663	41.8551
12	32.8903	Flume	-	<det	4.90987	<det	0.0933887	0.449597	1.00058	<det	4.76316	2.16493	0.0329299	<det	<det	4.4391	<det	0.915333	<det	5.8235	17.6287	42.2211
12	40.939	Flume	-	<det	4.87074	0.0178658	0.118838	0.451682	0.988938	<det	4.7824	2.32229	0.0324562	<det	<det	4.46612	<det	1.08622	<det	5.97055	17.1932	42.3013
13	-0.145833	Control	-	<det	7.81681	0.0706845	<det	0.213196	0.653068	<det	5.2076	0.922474	<det	0.0105673	<det	5.17988	<det	<det	<det	6.38713	24.3612	50.8226
13	0.0625	Control	-	<det	7.36215	0.042354	<det	0.372472	0.824278	0.0251998	5.25842	0.988801	0.0229987	<det	<det	5.28267	<det	<det	<det	6.21417	24.2766	50.6701
13	1.11458	Control	-	<det	7.15776	0.0282459	<det	0.419433	0.898938	0.0400615	5.2659	1.05357	0.0267347	<det	<det	5.25853	<det	<det	<det	6.20607	24.1852	50.5405
13	2.85417	Control	-	<det	6.73694	0.0249608	<det	0.47217	0.993937	0.0537695	5.25088	1.26193	0.0312744	<det	<det	5.2601	<det	<det	<det	6.19807	23.4612	49.7452
13	6.72917	Control	-	<det	6.22298	0.0160407	<det	0.490284	1.13228	0.0492859	5.19182	1.42514	0.0377488	<det	<det	5.28507	<det	<det	<det	6.22187	22.3711	48.4436
13	12.8125	Control	-	<det	6.08349	0.0146358	<det	0.508476	1.13565	0.0192443	5.23618	1.53574	0.0386963	<det	<det	5.29937	<det	<det	<det	6.2292	22.0074	48.1081
13	18.8542	Control	-	<det	6.08371	<det	<det	0.505233	1.14129	<det	5.24033	1.58892	0.0385819	<det	<det	5.42077	0.0789333	0.1974	<det	6.32793	21.338	47.9611
13	25.8646	Control	-	<det	6.07154	<det	<det	0.495919	1.14033	<det	5.23634	1.65772	0.0384997	<det	<det	5.52127	0.354633	<det	<det	6.39708	20.8386	47.752
13	32.9062	Control	-	<det	6.03874	<det	<det	0.501982	1.1359	<det	5.22238	1.70628	0.0382565	<det	<det	5.45963	0.0497	<det	<det	6.33737	21.275	47.7652
13	40.9688	Control	-	<det	5.87667	0.0112863	<det	0.492093	1.09855	<det	5.18036	1.72026	0.0372094	<det	<det	5.35017	<det	0.807867	<det	6.25183	20.0552	46.8815
13	-0.145833	Flume	-	<det	7.37522	0.0261671	<det	<det	0.603903	<det	4.69877	0.905441	<det	<det	<det	4.53637	<det	<det	<det	5.6802	22.987	46.813
13	0.0625	Flume	-	<det	5.76743	0.0128604	<det	0.454595	1.0785	0.0545301	4.70734	1.08408	0.0365914	<det	<det	4.522	<det	<det	<det	5.6662	21.3955	44.7796
13	1.11458	Flume	-	<det	5.45648	0.0146803	<det	0.45178	1.03848	0.0510775	4.74756	1.36401	0.0351569	<det	<det	4.5559	<det	<det	<det	5.6893	20.2563	43.6607
13	2.85417	Flume	-	<det	5.4199	<det	0.0619836	0.462103	1.02926	0.0568518	4.76052	1.49777	0.0349334	<det	<det	4.51443	<det	<det	<det	5.60797	20.4435	43.8893
13	6.72917	Flume	-	<det	5.33998	0.0140622	0.073017	0.463257	1.02183	0.0626727	4.70235	1.62872	0.0345332	<det	<det	4.56247	<det	<det	<det	5.67067	19.9115	43.485
13	12.8125	Flume	-	<det	5.25437	0.0224522	0.0806914	0.474445	1.02071	0.0558777	4.74867	1.76195	0.0340475	<det	<det	4.5472	<det	<det	<det	5.68733	19.8078	43.4956
13	18.8542	Flume	-	<det	5.31896	0.0146168	0.0893094	0.459652	1.0235	0.0391974	4.79573	1.86593	0.0341953	<det	<det	4.6151	0.448333	<det	<det	5.74585	19.3014	43.7518
13	25.8646	Flume	-	<det	5.40876	0.0117272	0.111169	0.475676	1.04556	<det	4.83989	2.04854	0.0350647	<det	<det	4.81363	0.186067	0.609817	<det	5.92075	18.9681	44.4747
13	32.9062	Flume	-	<det	5.37038	0.0182644	0.126176	0.485407	1.04353	<det	4.89426	2.15892	0.0347933	<det	<det	4.7251	<det	0.9039	<det	5.8915	19.1924	44.8446
13	40.9688	Flume	-	<det	5.28216	0.0193886	0.0763142	0.485277	1.01819	<det	4.89815	2.15789	0.034211	<det	<det	4.67	<det	0.906775	<det	6.03582	18.6077	44.1918
14	-0.100833	Control	-	<det	7.92132	0.0699161	<det	0.232399	0.658234	<det	5.24203	0.924497	<det	<det	<det	5.26525	<det	<det	<det	6.37837	24.6697	51.3618
14	0.0583333	Control	-	<det	7.7867	0.0644811	<det	0.298806	0.691474	<det	5.22373	0.963805	<det	<det	<det	5.25987	<det	<det	<det	6.24403	24.6512	51.1841
14	1.10417	Control	-	<det	7.63855	0.0544692	<det	0.346517	0.725929	<det	5.2213	1.02237	<det	<det	<det	5.42157	<det	<det	<det	6.26397	24.1183	50.813
14	2.69792	Control	-	<det	7.41325	0.0493512	<det	0.441942	0.819601	0.0131502	5.27962	1.2286	0.0221725	<det	<det	5.26083	<det	<det	<det	6.23083	24.5753	51.3347
14	6.71875	Control	-	<det	6.78652	0.0252391	<det	0.535012	1.0011	0.0236711	5.18119	1.43246	0.0314654	<det	<det	5.2186	<det	<det	<det	6.22163	23.5367	49.9936
14	12.8021	Control	-	<det	6.49729	0.0162257	<det	0.559818	1.07285	<det	5.32539	1.57811	0.0358284	<det	<det	5.21977	<det	<det	<det	6.21193	23.3842	49.9014
14	18.8771	Control	-	<det	6.43725	<det	<det	0.567045	1.10115	<det	5.30198	1.64494	0.0373089	<det	<det	5.22523	<det	<det	<det	6.20173	23.267	49.7837
14	25.8854	Control	-	<det	6.36447	<det	<det	0.57311	1.0996	<det	5.35113	1.66697	0.0382036	<det	<det	5.2468	<det	<det	<det	6.21963	23.119	49.6789
14	32.9271	Control	-	<det	6.38606	<det	<det	0.572844	1.1129	<det	5.32984	1.76728	0.038746	<det	<det	5.28867	0.409067	0.217233	<det	6.27877	22.2918	49.6932
14	41	Control	-	<det	6.20698	0.0108559	<det	0.563095	1.09512	<det	5.29168	1.78727	0.0375796	<det	<det	5.30723	0.0867	0.784167	<det	6.2762	21.401	48.8478
14	-0.100833	Flume	-	<det	7.49863	0.0342645	<det	<det	0.614495	<det	4.67912	0.901444	<det	<det	<det	4.49203	<det	<det	<det	5.69377	23.4384	47.3521
14	0.0583333	Flume	-	<det	6.22139	0.012658	<det	0.525296	1.06815	0.0267336	4.69657	1.10095	0.0373157	<det	<det	4.54647	<det	0.2104	<det	5.71927	22.4299	46.5951
14	1.10417	Flume	-	<det	5.76322	0.014766	<det	0.568398	1.07002	0.0516808	4.66721	1.49046	0.0369098	<det	<det	4.46567	<det	<det	<det	5.63563	21.5448	45.3087
14	2.69792	Flume	-	<det	5.58197	0.0222617	0.0823025	0.576786	1.03873	0.0616244	4.68077	1.71034	0.0359425	<det	<det	4.5041	<det	<det	<det	5.65363	21.0108	44.9593
14	6.71875	Flume	-	<det	5.511	0.0183922	0.0638184	0.576658	0.991293	0.0650529	4.74318	1.85423	0.0343808	<det	<det	4.50263	<det	<det	<det	5.67607	20.6537	44.6904
14	12.8021	Flume	-	<det	5.53051	0.0213519	0.0554593	0.602581	1.00676	0.0663888	4.89082	2.11521	0.0342646	<det	<det	4.5316	<det	<det	<det	5.65	21.1965	45.7015
14	18.8771	Flume	-	<det	5.50313	0.0176902	0.0801484	0.594341	1.01763	0.0652359	4.87717	2.33783	0.0340017	<det	<det	4.50603	0.3478	0.2152	<det	5.6625	20.5177	45.7764
14	25.8854	Flume	-	<det	5.49945	0.0220159	0.0630293	0.595367	1.0122	0.0658954	4.84775	2.48385	0.0340181	<det	<det	4.49307	<det	0.544433	<det	5.5875	20.63	45.8786
14	32.9271	Flume	-	<det	5.57336	0.017662	0.0977131	0.624614	1.01485	0.0607797	4.94089	2.74957	0.0344435	0.00986342	<det	4.5475	<det	0.5662	<det	5.70363	20.9736	46.9147
14	41	Flume	-	<det	5.46088	0.0255489	0.0688707	0.621971	0.994974	0.050693	4.94928	2.836	0.0336284	<det	0.0478	4.43372	<det	0.68725	<det	5.71382	20.3699	46.2943
* <det indicates value was below the machine detection limit, - indicates no measurement was made
† HCO3- calculated via charge balance (excluding Si), calculations yielding negative values were set to zero.

## Sheet: Table DR7
Table DR7: Uncertainty estimates of dissolved load measurements*
	Calibration uncertainty											Maximum standard deviation from replicates
Exp #	Ba (%)	Ca (%)	Cu (%)	Fe (%)	K (%)	Mg (%)	Mn (%)	Na (%)	Si (%)	Sr (%)	Zn (%)	F- (%)	Cl- (%)	NO2- (%)	NO3- (%)	PO43- (%)	SO42- (%)	TDS (%)
1	5	5	5	5	5	5	5	6	5	5	10	N/A	10.17	N/A	2.16	5.06	3.29	4.86
2	5	5	5	5	5	5	5	6	5	5	10	3.9	3.78	N/A	N/A	N/A	5.58	7.16
3	13	6	11	N/A	7	9	N/A	5	5	6	8	11.17	2.19	N/A	5.91	N/A	2.33	3.75
4	6.4	3	9	3.6	7.8	11.7	8.9	5.2	9.3	8.1	5.4	9.4	2.33	N/A	N/A	N/A	5.45	2.84
5	6.4	3	9	3.6	7.8	11.7	8.9	5.2	9.3	8.1	5.4	13.9	0.27	N/A	N/A	N/A	0.39	2.22
6	6.4	3	9	3.6	7.8	11.7	8.9	5.2	9.3	8.1	5.4	9.89	1.14	N/A	N/A	N/A	1.35	2.35
7	3	4	6	N/A	3	5	3	8	5	3	N/A	N/A	0.45	N/A	N/A	N/A	0.81	2.98
8	3	4	6	N/A	3	5	3	8	5	3	N/A	N/A	3.03	N/A	N/A	N/A	1.63	3.08
9	3	4	6	N/A	3	5	3	8	5	3	N/A	N/A	1.48	N/A	N/A	N/A	4.8	5.89
10	3	4	6	N/A	3	5	3	8	5	3	N/A	N/A	0.94	N/A	N/A	N/A	1.68	2.97
11	N/A	2	5	N/A	3	6	4	6	2	2	N/A	N/A	6.28	35.1	15.27	N/A	3.84	2.91
12	N/A	2	5	2	3	6	4	6	2	2	N/A	N/A	6.79	21.25	11.25	N/A	3.64	2.91
13	N/A	2	5	2	3	6	4	6	2	2	N/A	N/A	5.4	24.76	5.26	N/A	4.2	2.68
14	N/A	3	5	2	4	6	7	7	8	6	N/A	N/A	4.76	7.55	5.67	N/A	4.31	2.93
* Uncertainty for cation and anion measurements comes from calibration uncertainty and the standard deviation of samples measured in triplicate, respectively. We report the maximum calibration uncertainty and standard deviation in a given experiment to provide a conservative unceratinty estimate. TDS uncertainties are calculated from error propigation and we report the maximum uncertainty in a gi…
